# Supplementary material
Source: publisher figshare collection journal article supplement (https://acs.figshare.com/ndownloader/files/4542508)
Supplement: Supplementary file 1 [file 4542508]

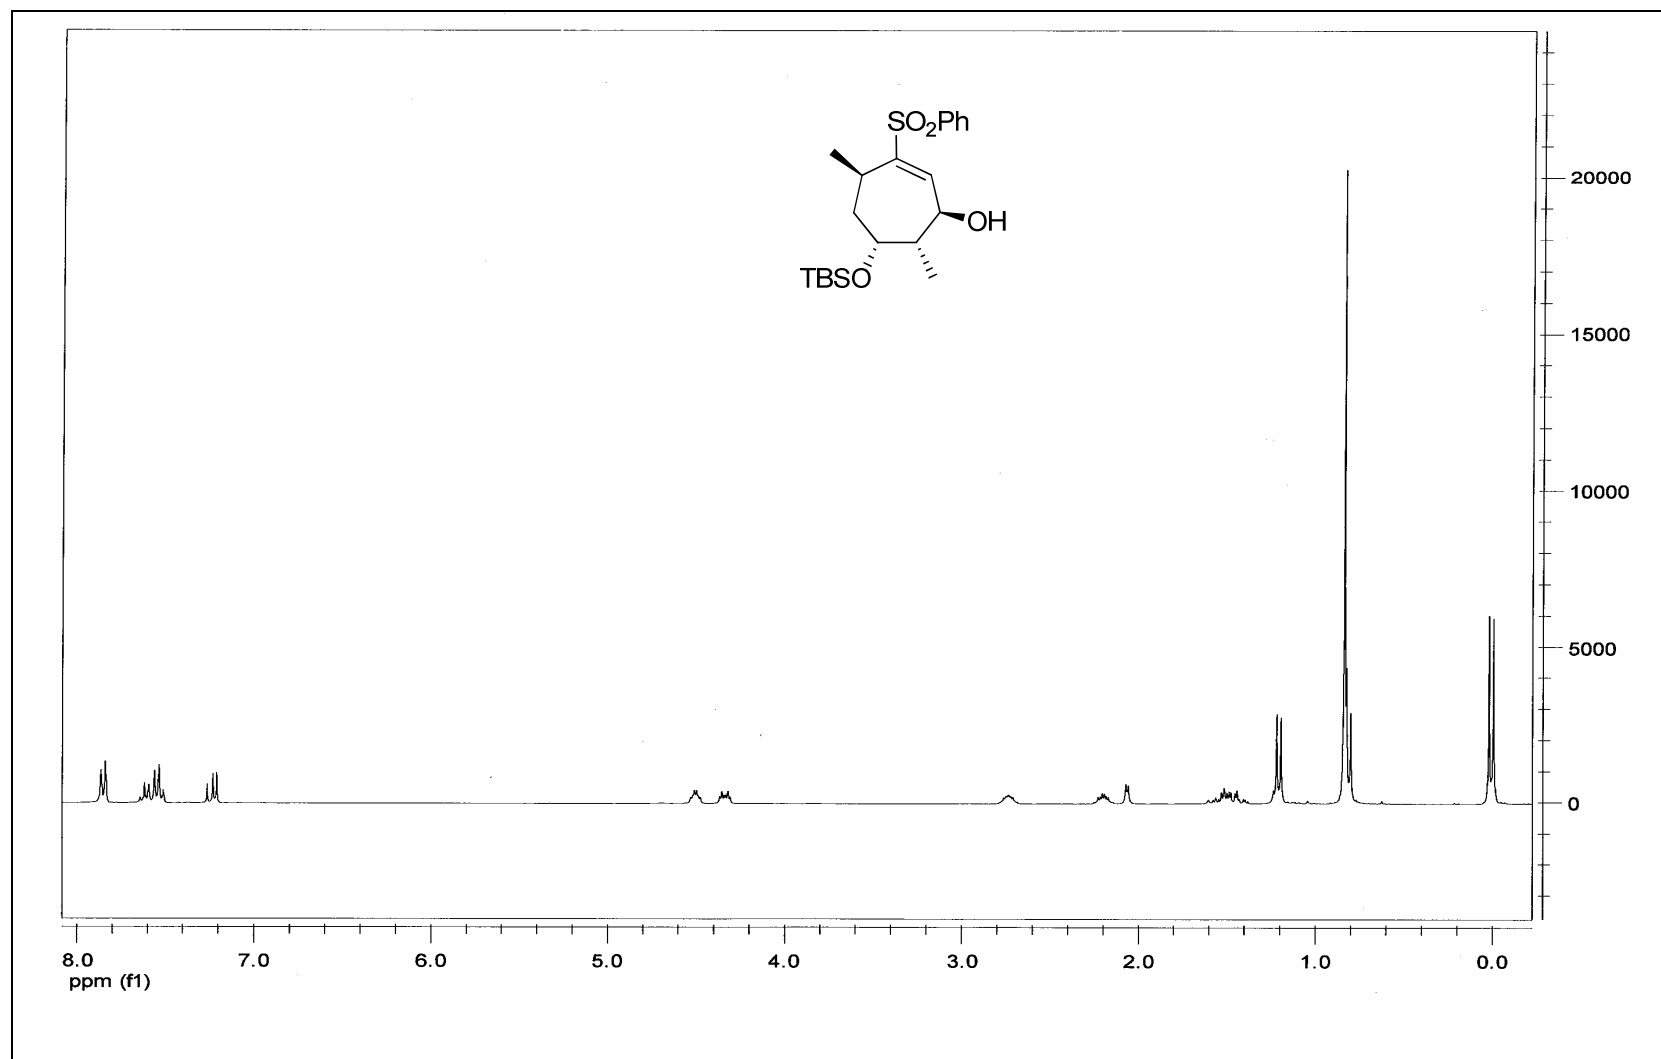

300 MHz <sup>1</sup>H NMR of compound **III-1s** in CDCl<sub>3</sub>

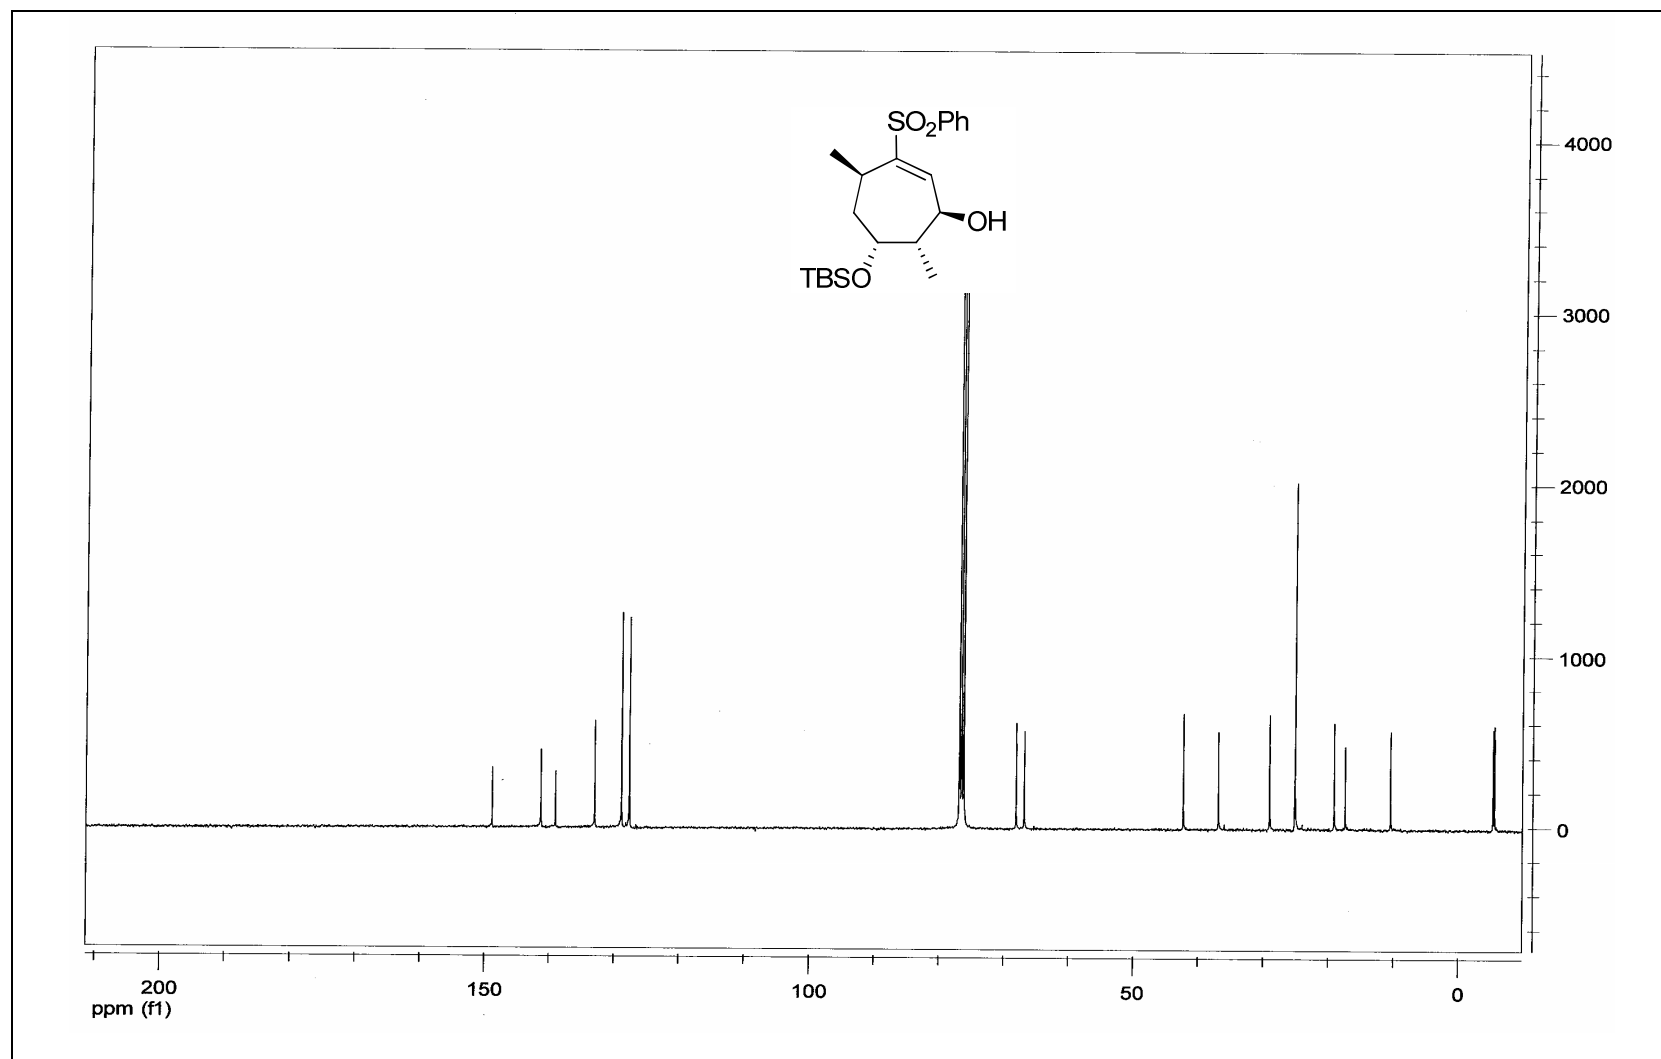

100 MHz  $^{13}\text{C}$  NMR of compound **III-1s** in  $\text{CDCl}_3$



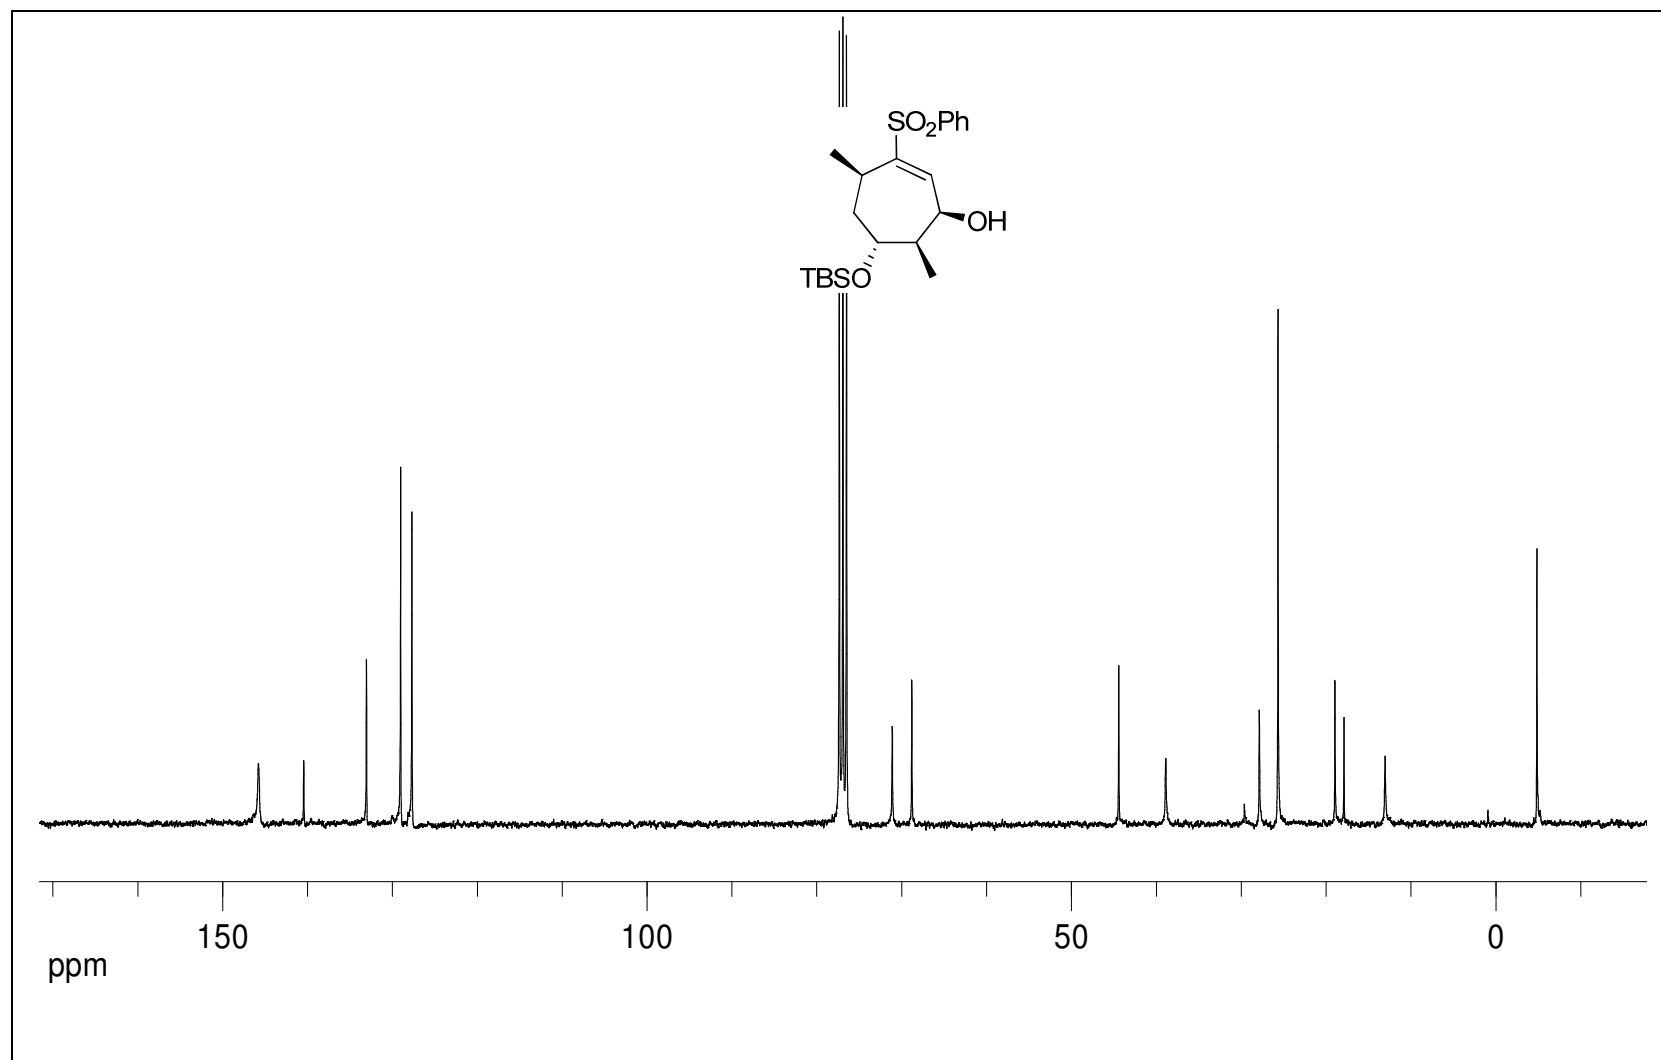

75 MHz  $^{13}\text{C}$  NMR of compound **III-2s** in  $\text{CDCl}_3$

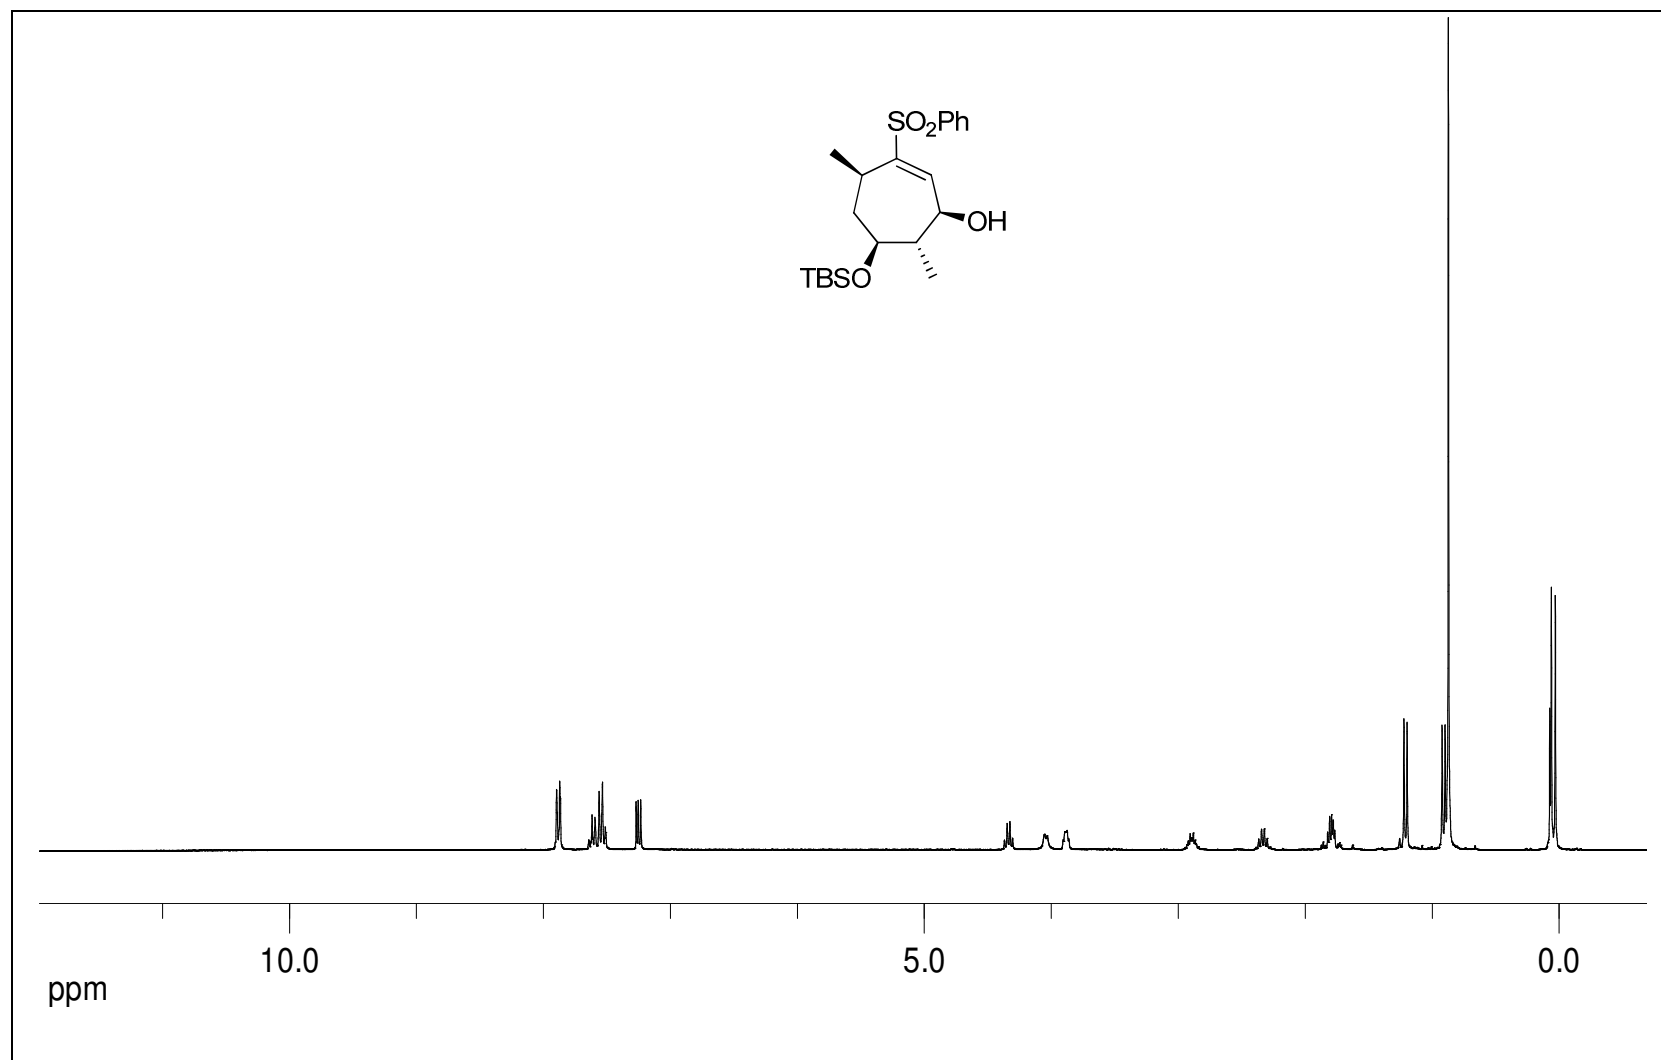

300 MHz <sup>1</sup>H NMR of compound **III-3s** in CDCl<sub>3</sub>

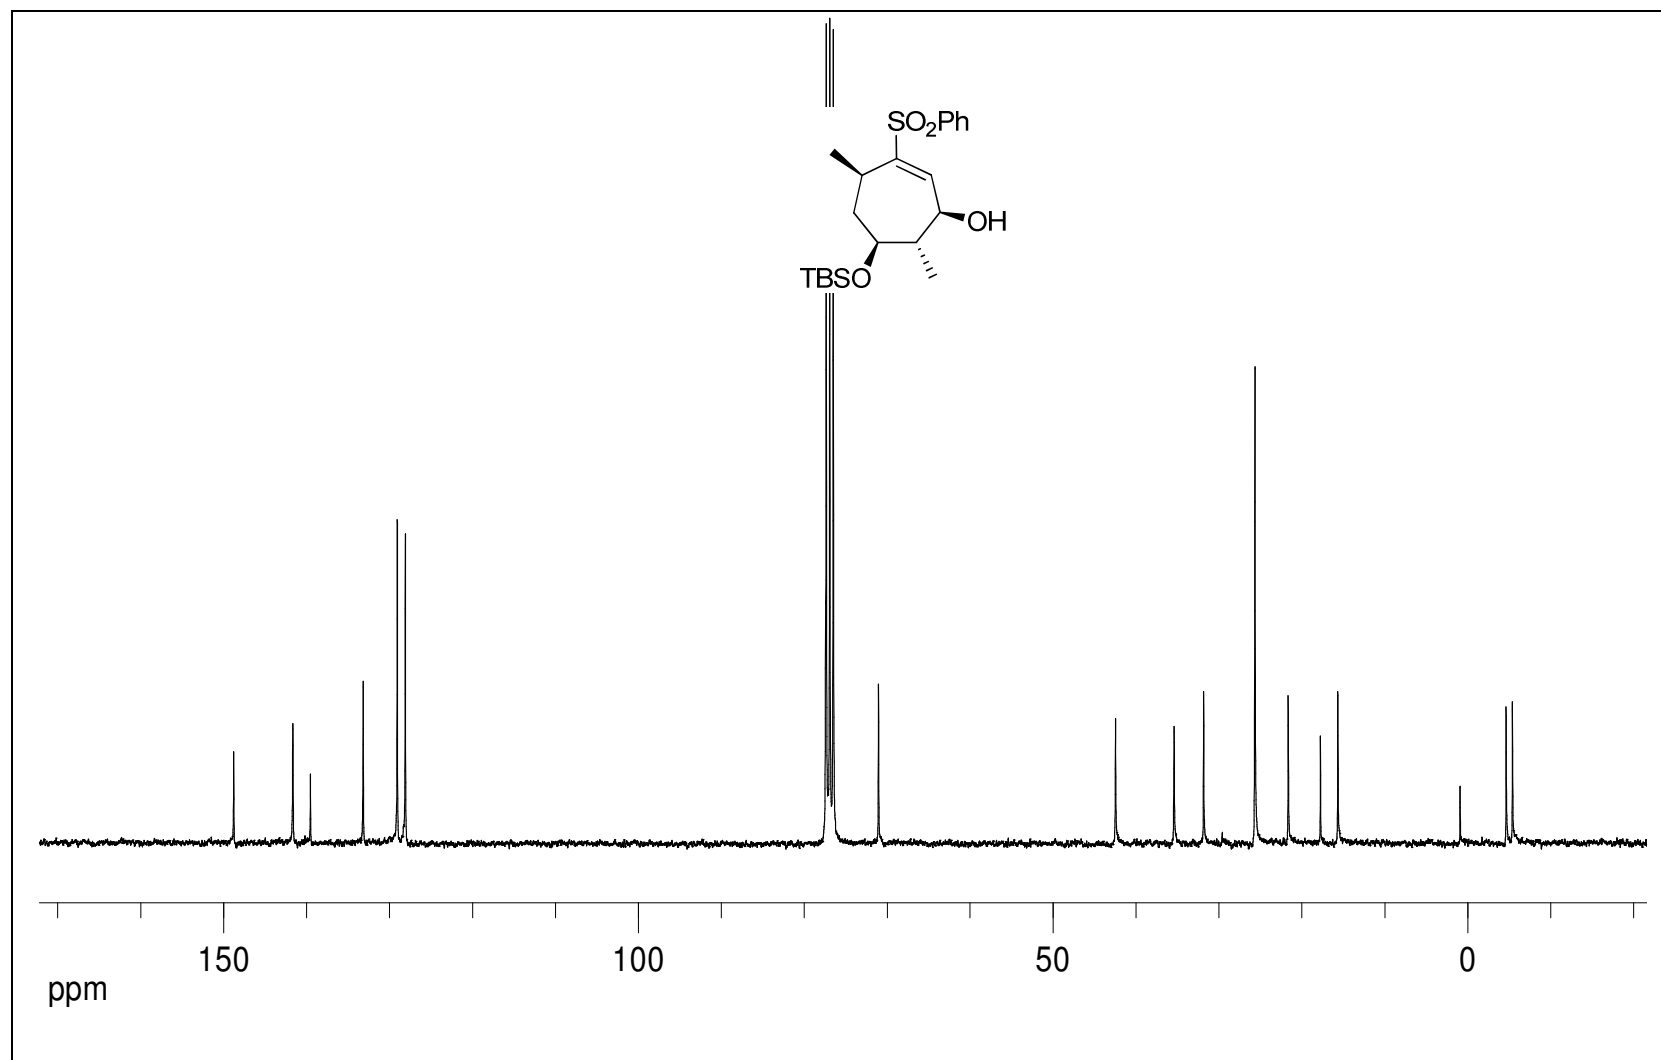

75 MHz <sup>13</sup>C NMR of compound **III-3s** in CDCl<sub>3</sub>



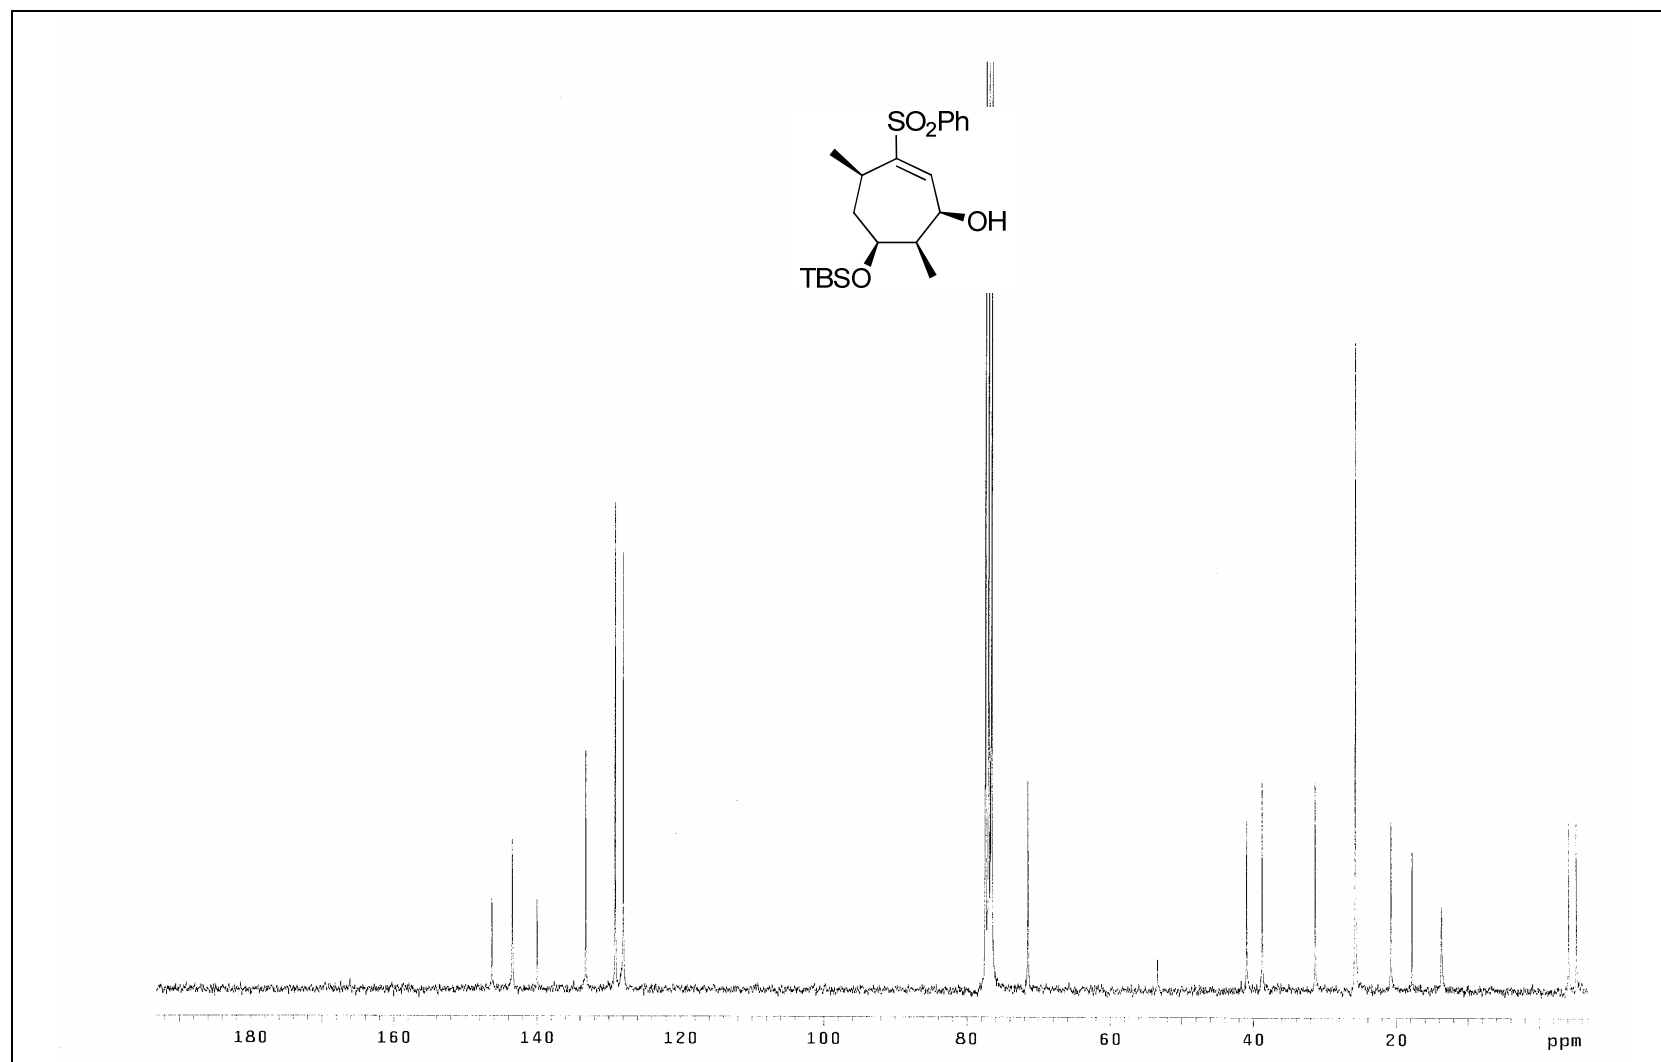

300 MHz  $^{13}\text{C}$  NMR of compound **III-4s** in  $\text{CDCl}_3$



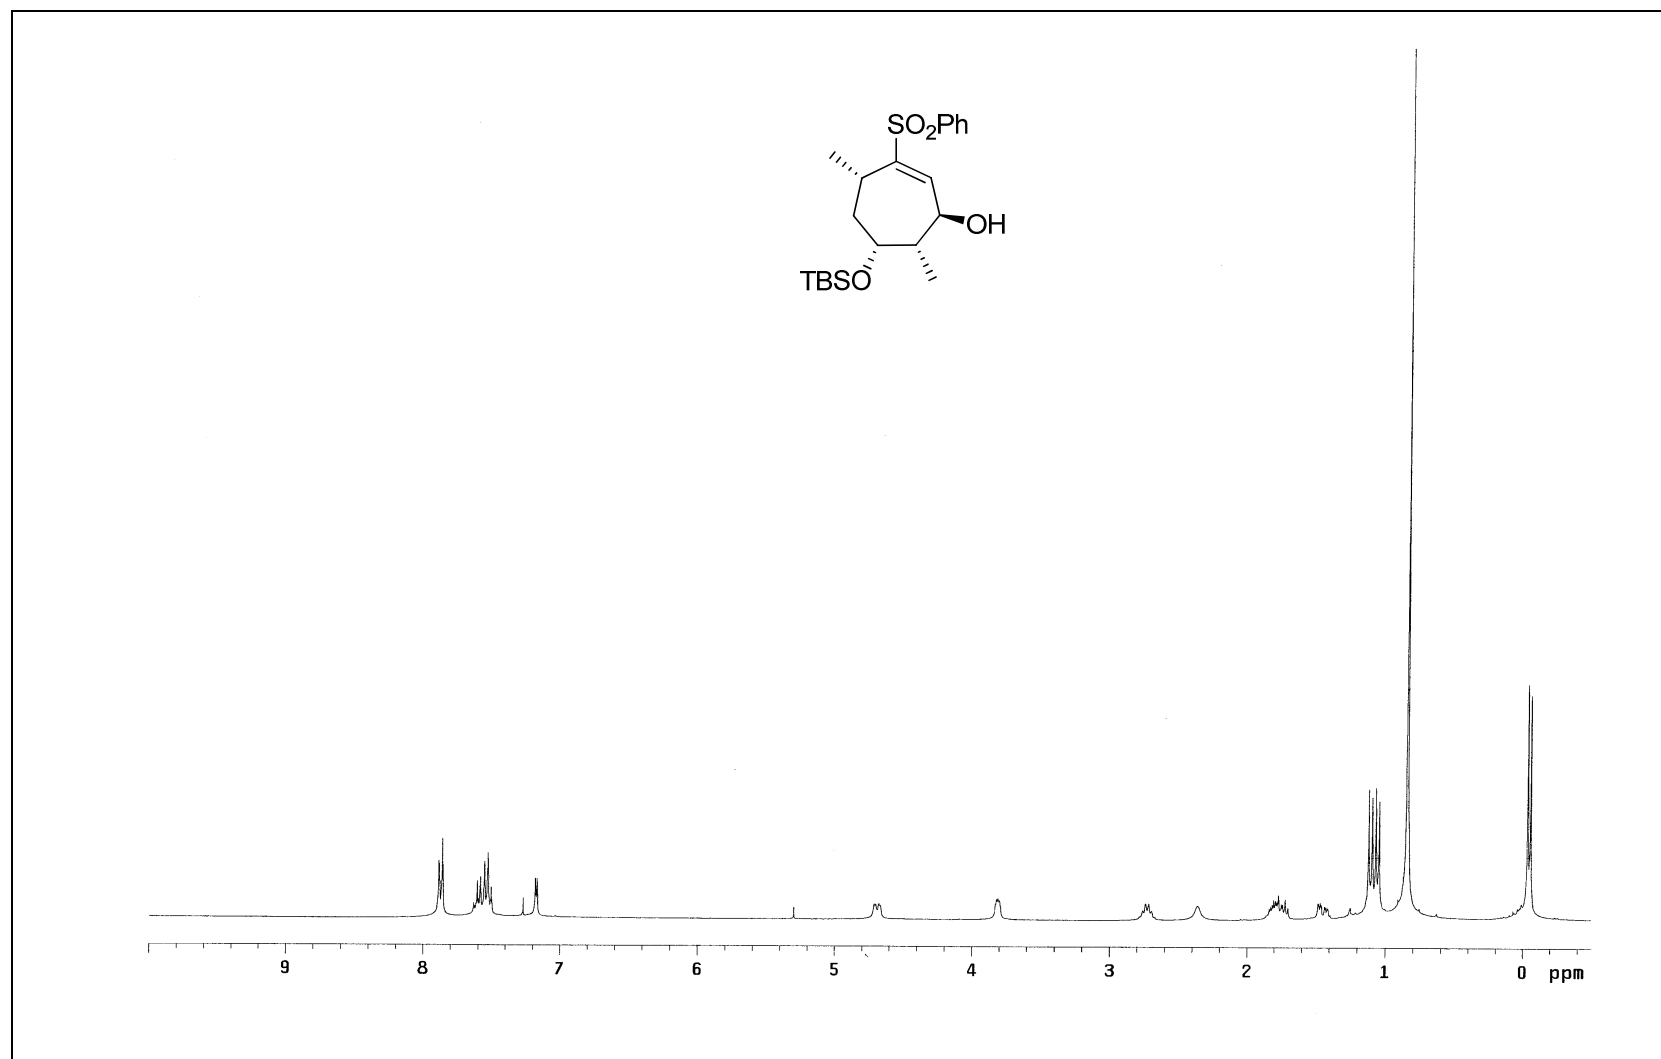

300 MHz <sup>1</sup>H NMR of compound **III-1a** in CDCl<sub>3</sub>

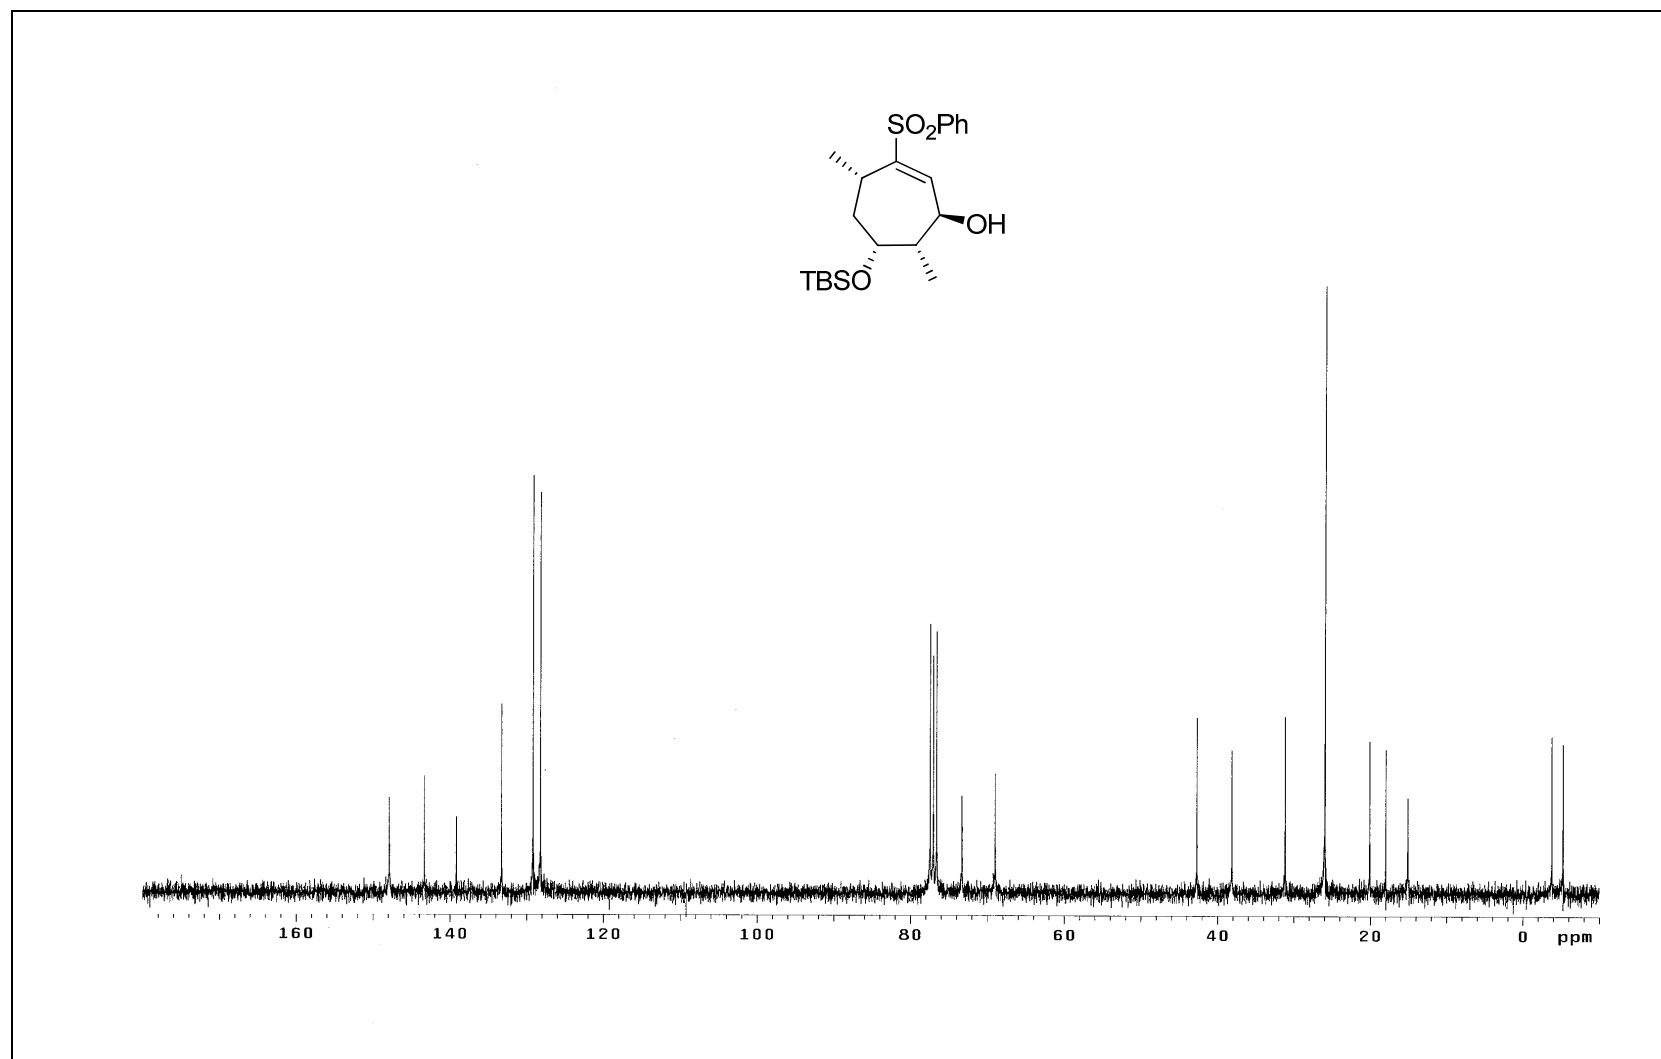

75 MHz <sup>13</sup>C NMR of compound **III-1a** in CDCl<sub>3</sub>

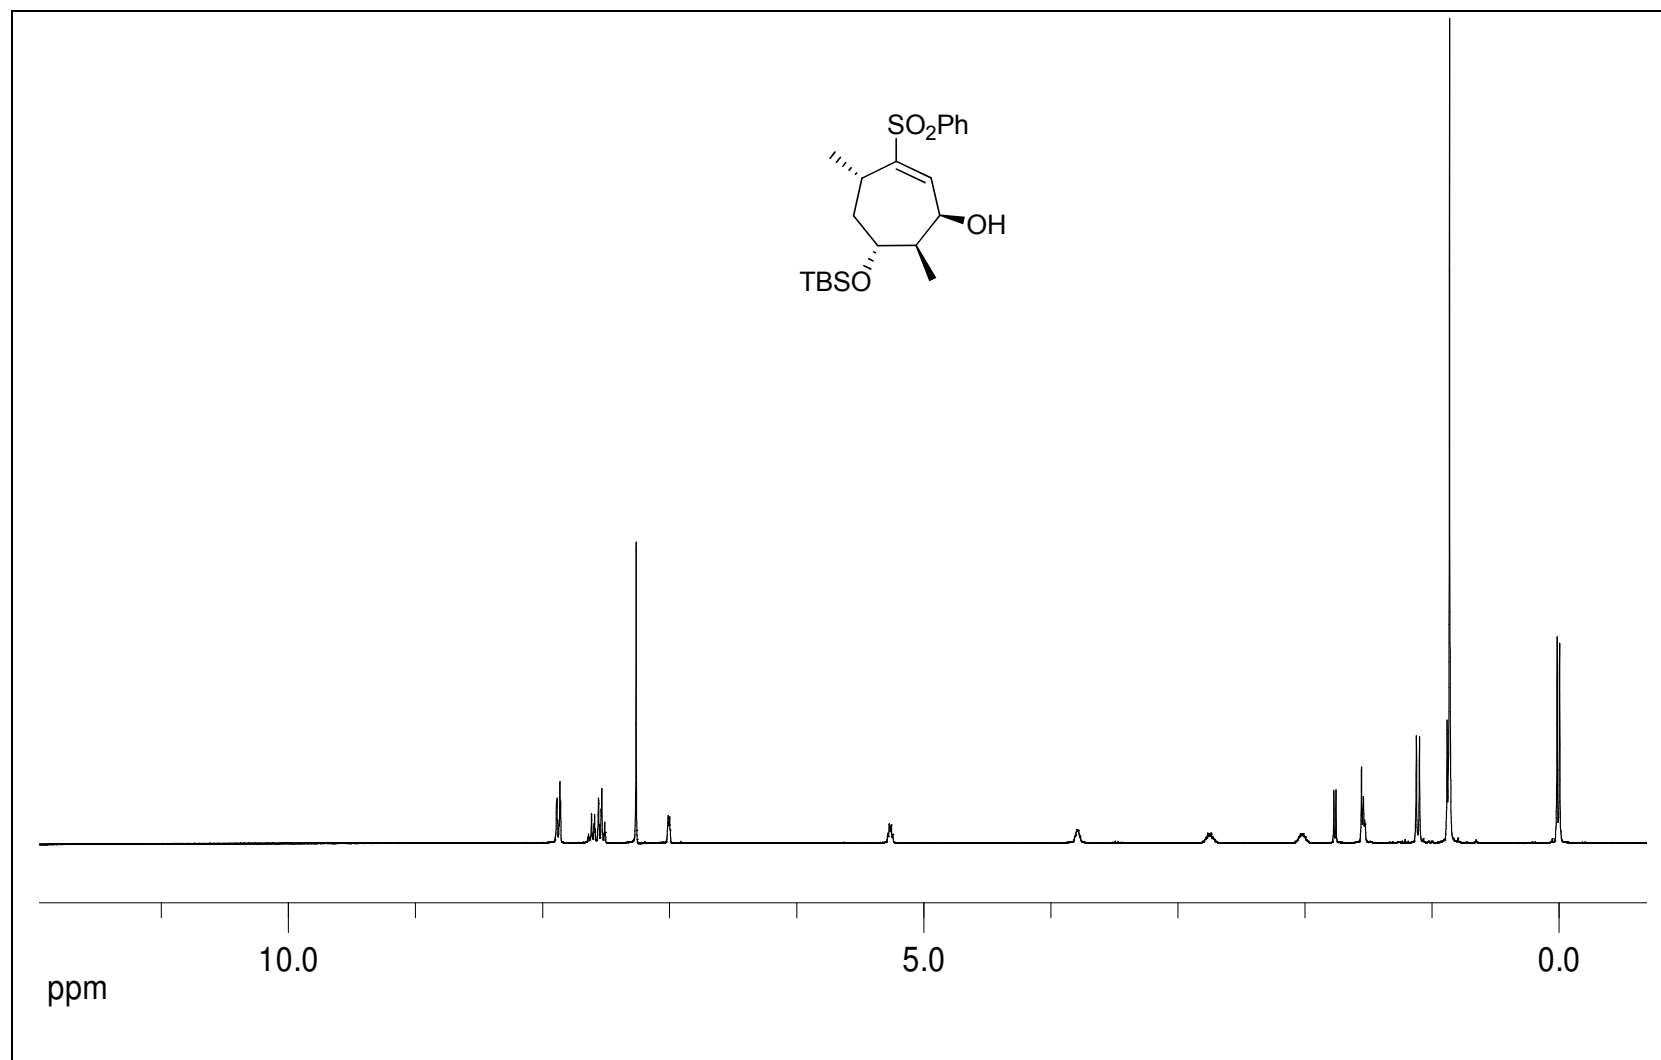

300 MHz <sup>1</sup>H NMR of compound **III-2a** in CDCl<sub>3</sub>

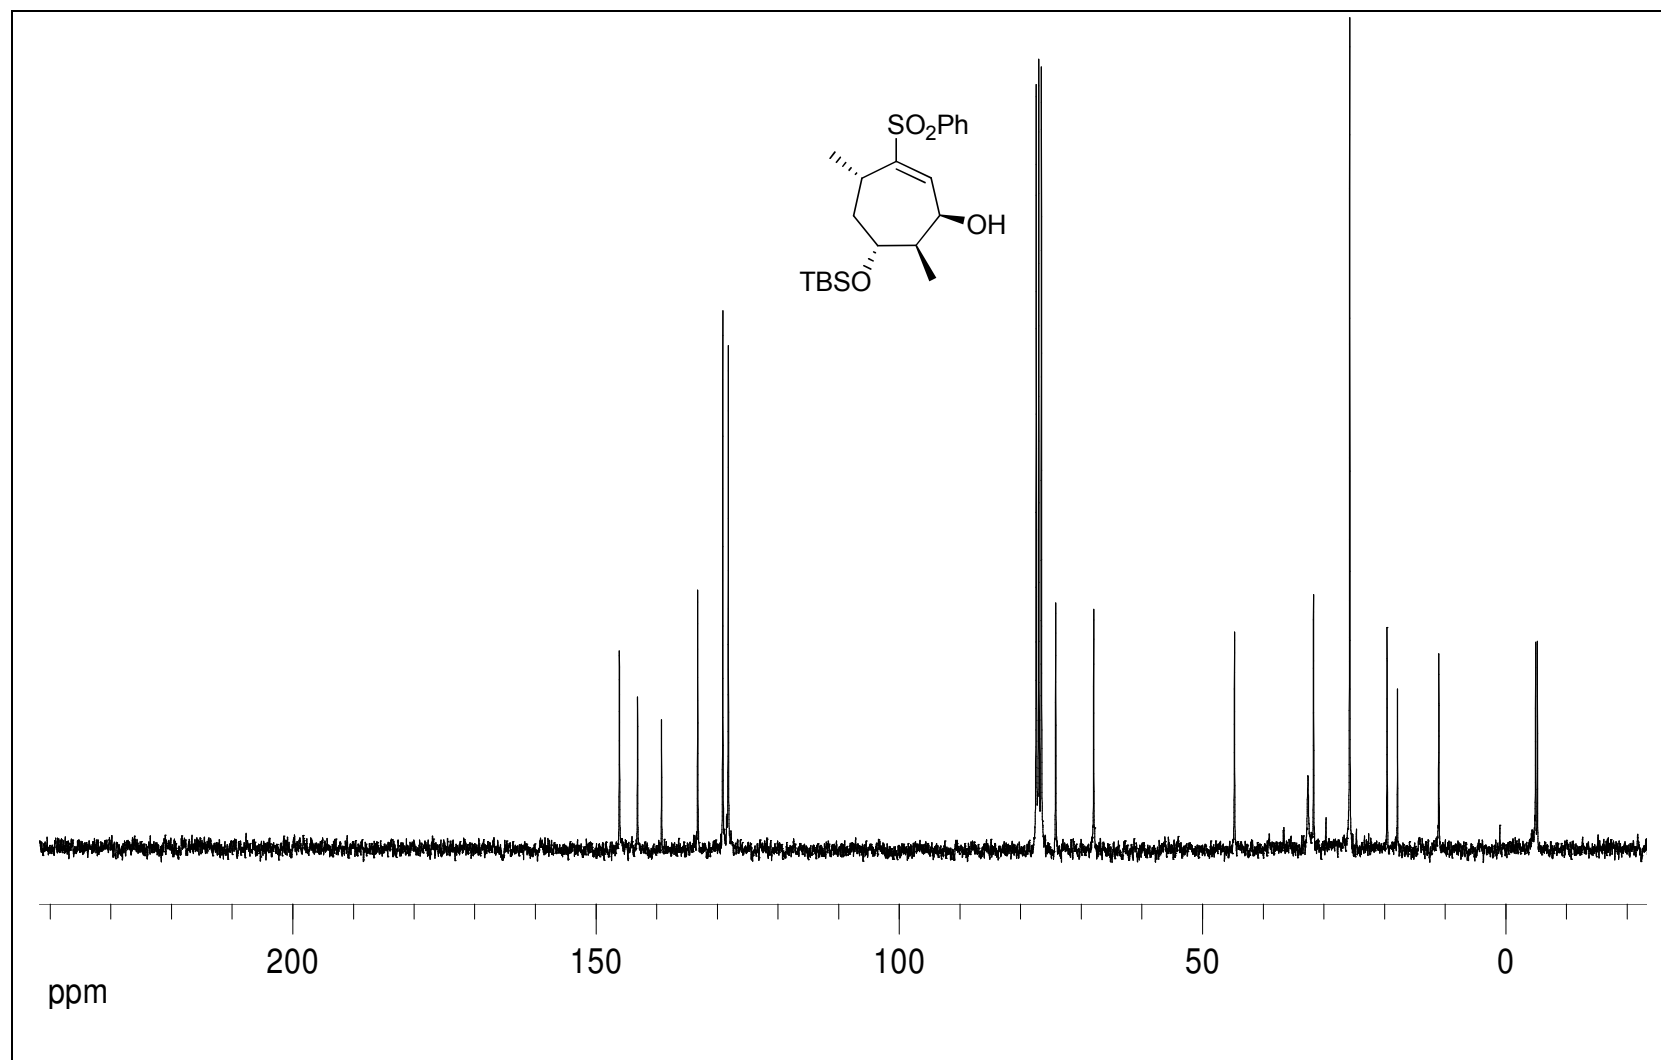

75 MHz  $^{13}\text{C}$  NMR of compound **III-2a** in  $\text{CDCl}_3$

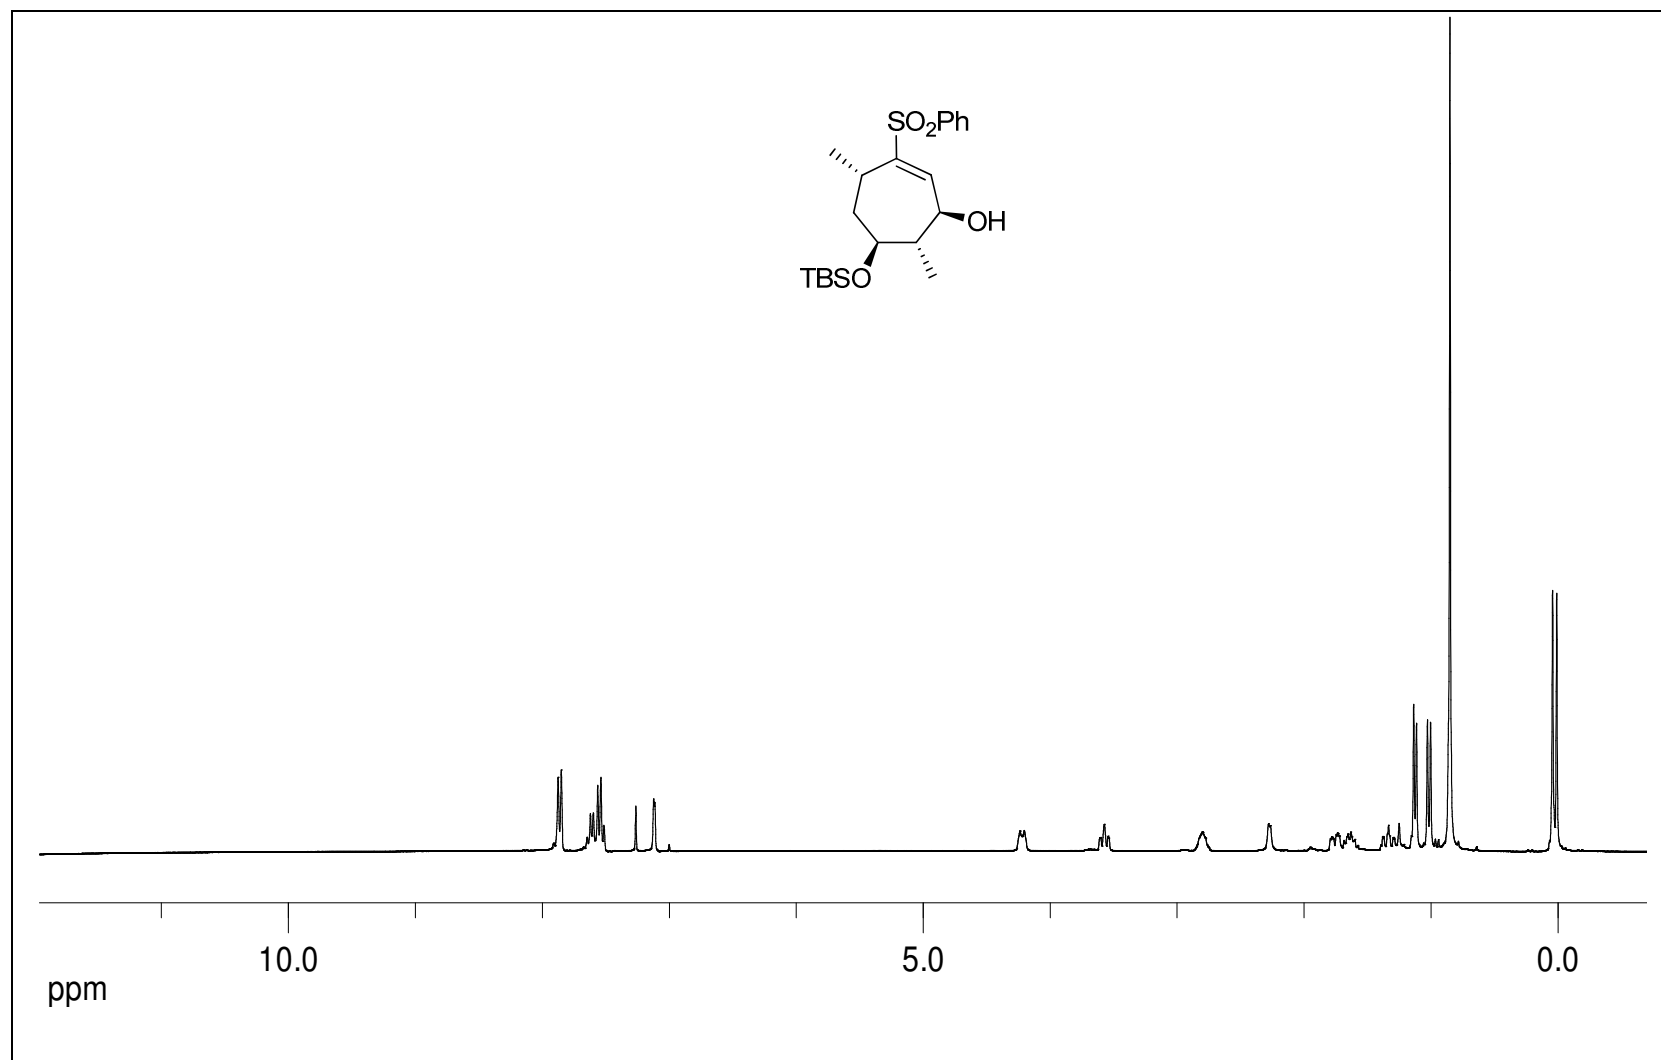

300 MHz <sup>1</sup>H NMR of compound **III-3a** in CDCl<sub>3</sub>



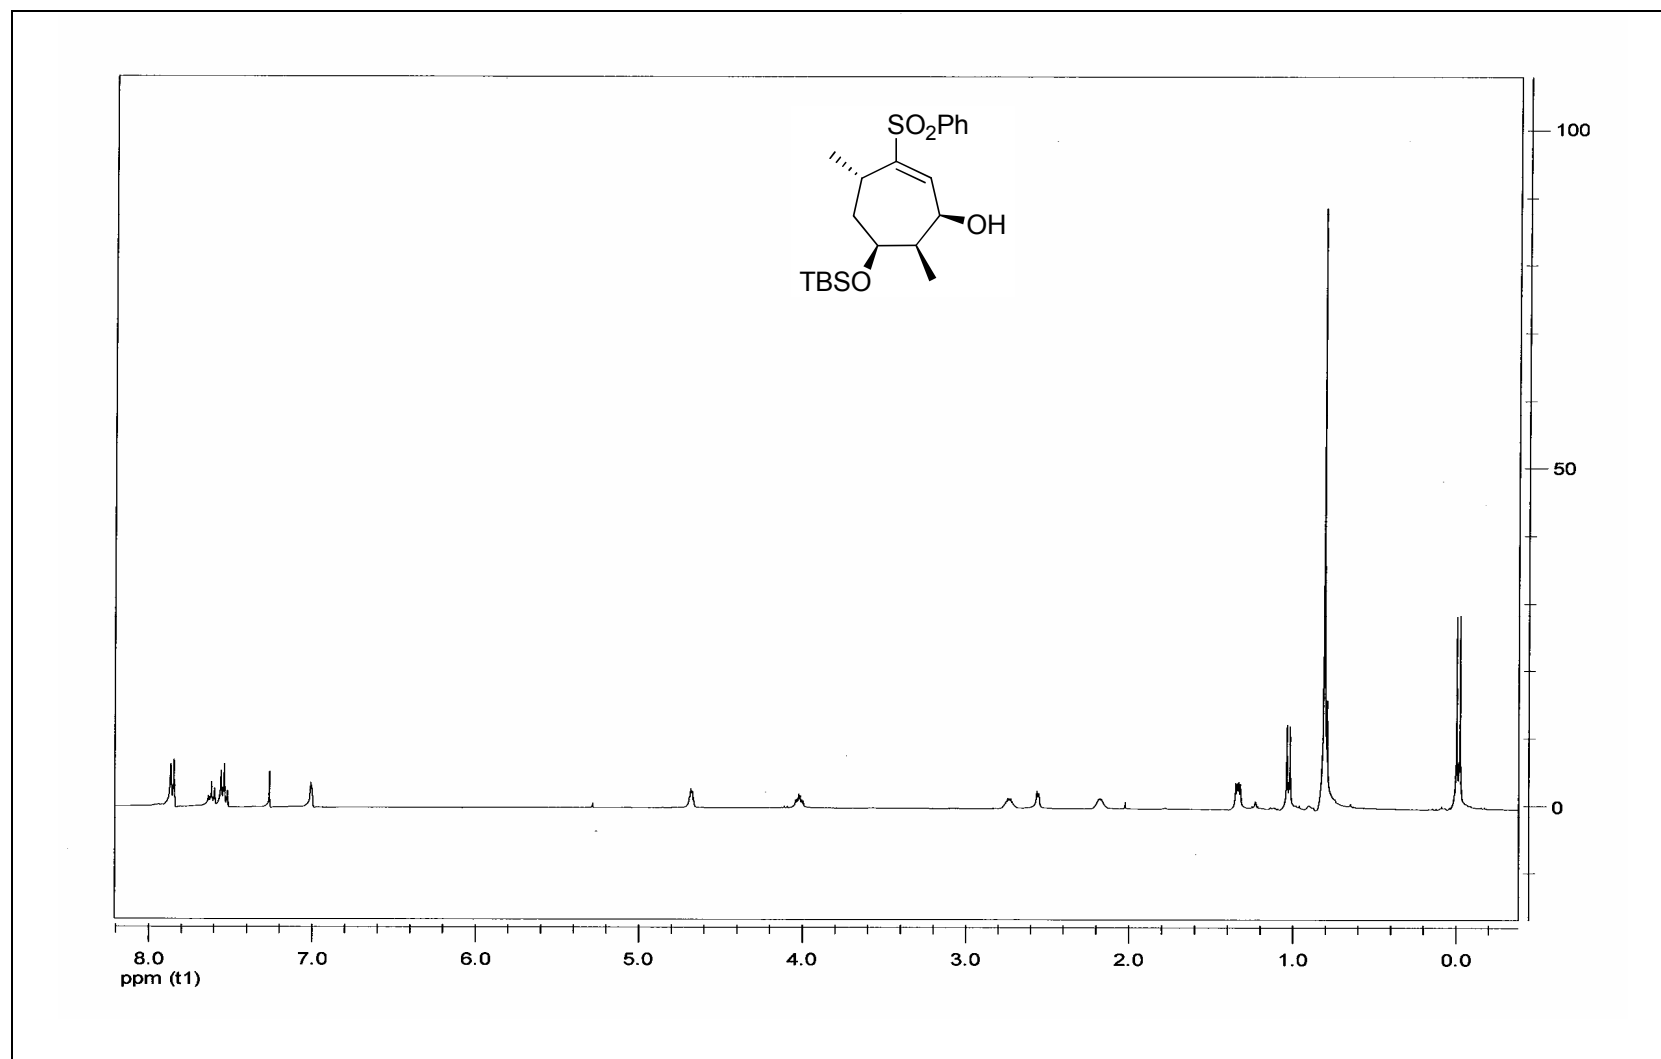

300 MHz <sup>1</sup>H NMR of compound **III-4a** in CDCl<sub>3</sub>





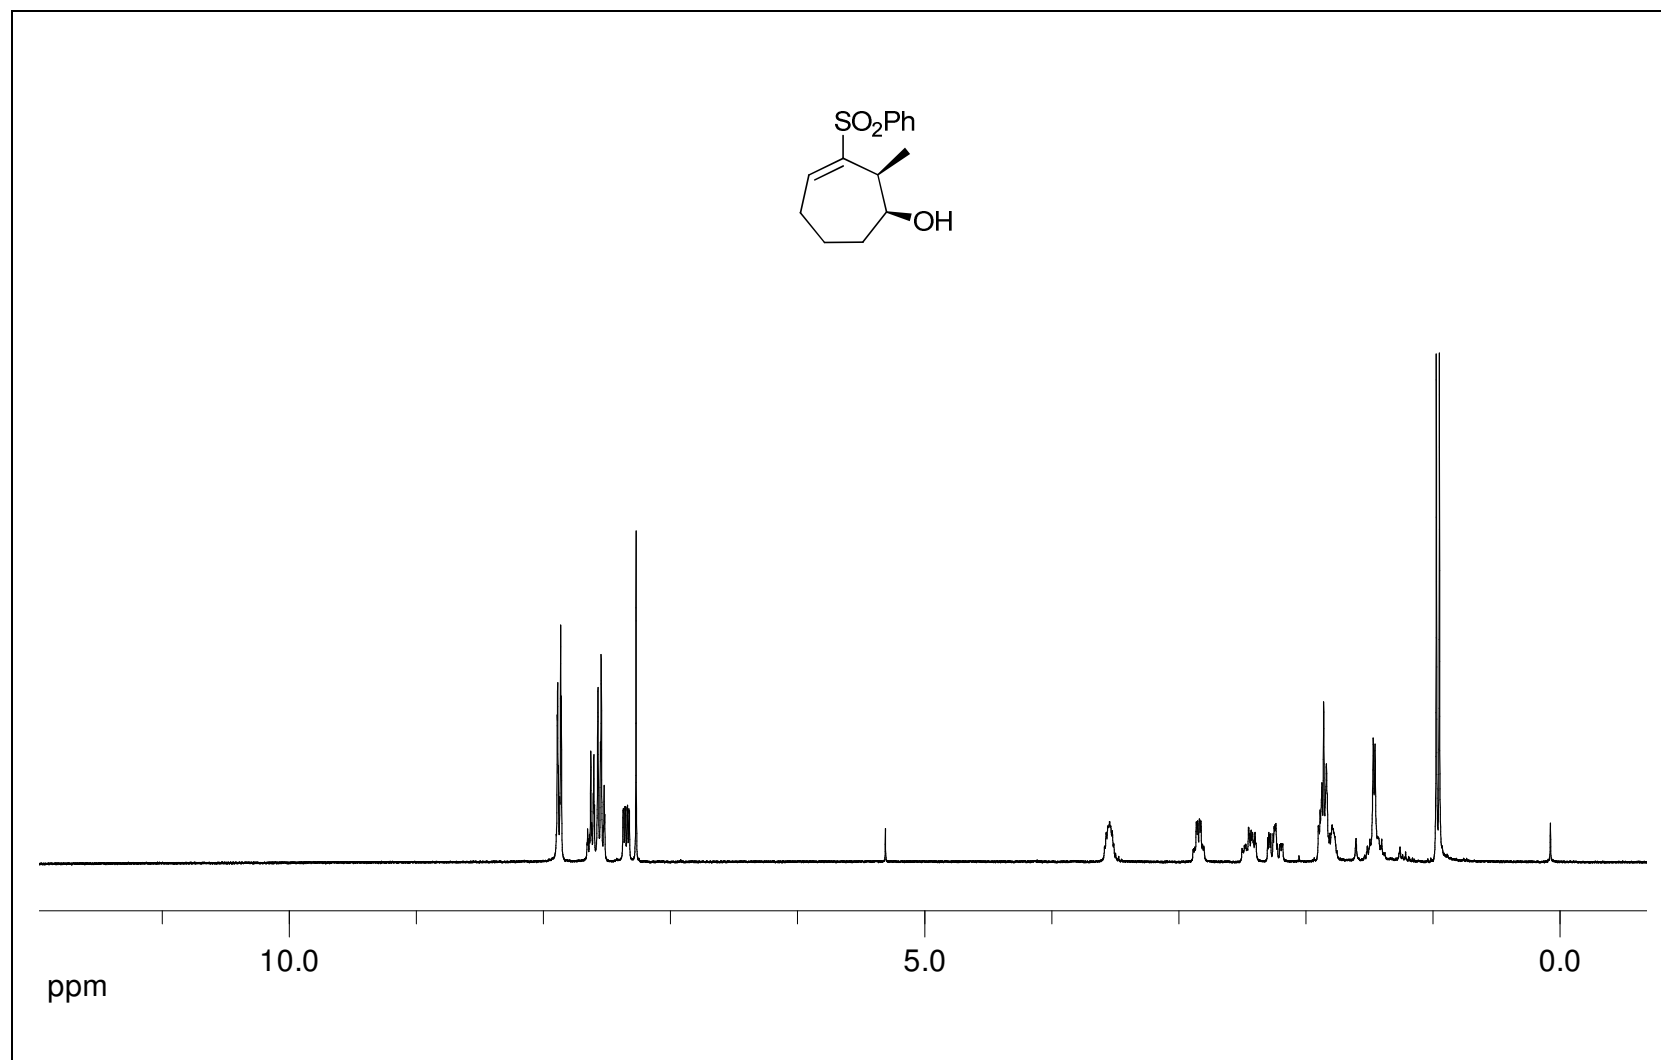

300 MHz <sup>1</sup>H NMR of compound **II-5s** in CDCl<sub>3</sub>

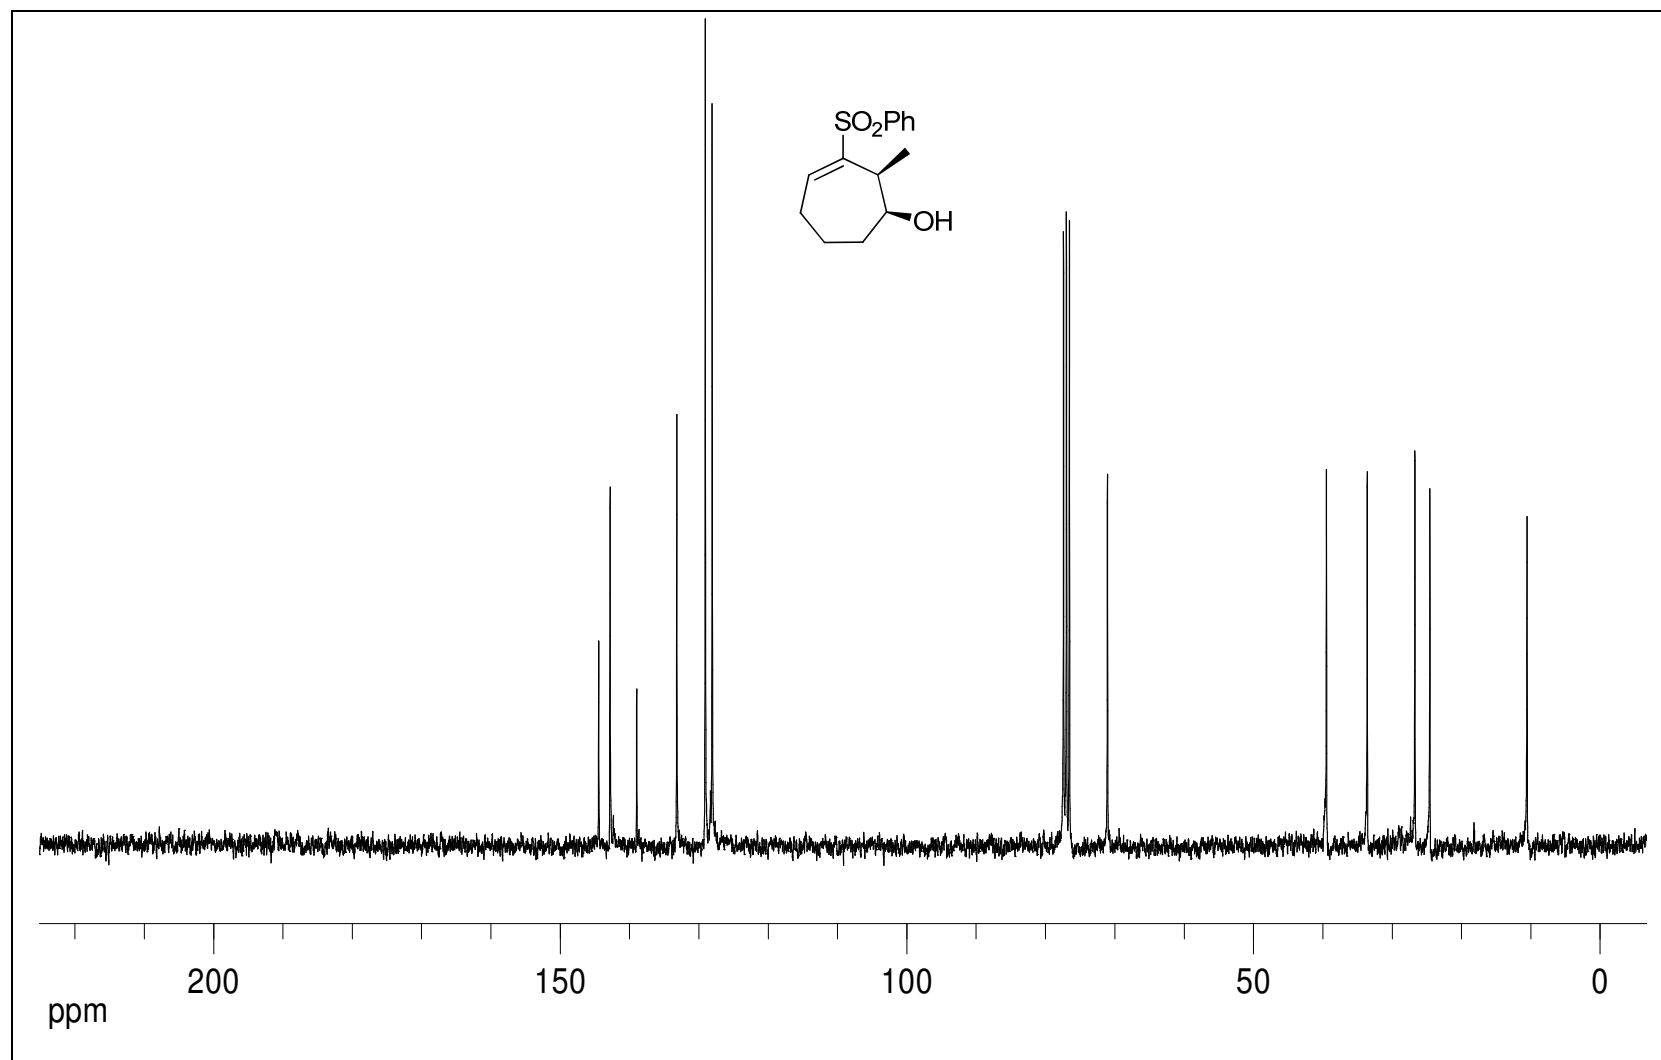

75 MHz  $^{13}\text{C}$  NMR of compound **II-5s** in  $\text{CDCl}_3$

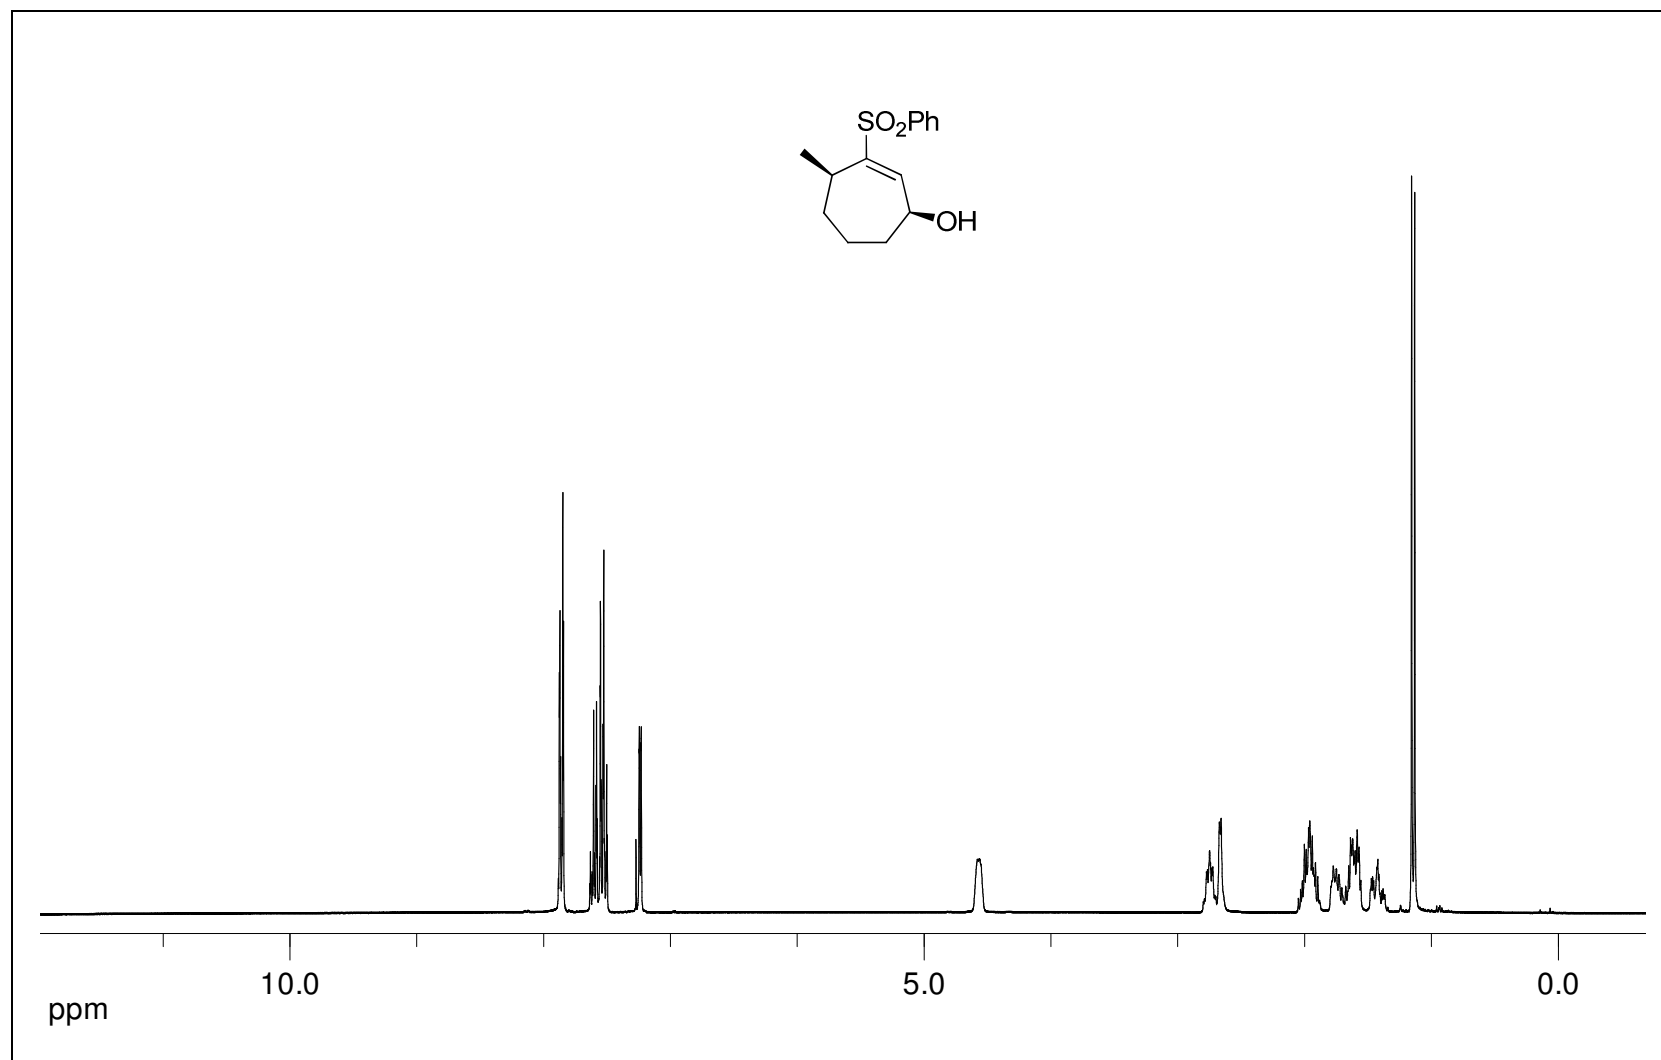

300 MHz <sup>1</sup>H NMR of compound **III-5s** in CDCl<sub>3</sub>

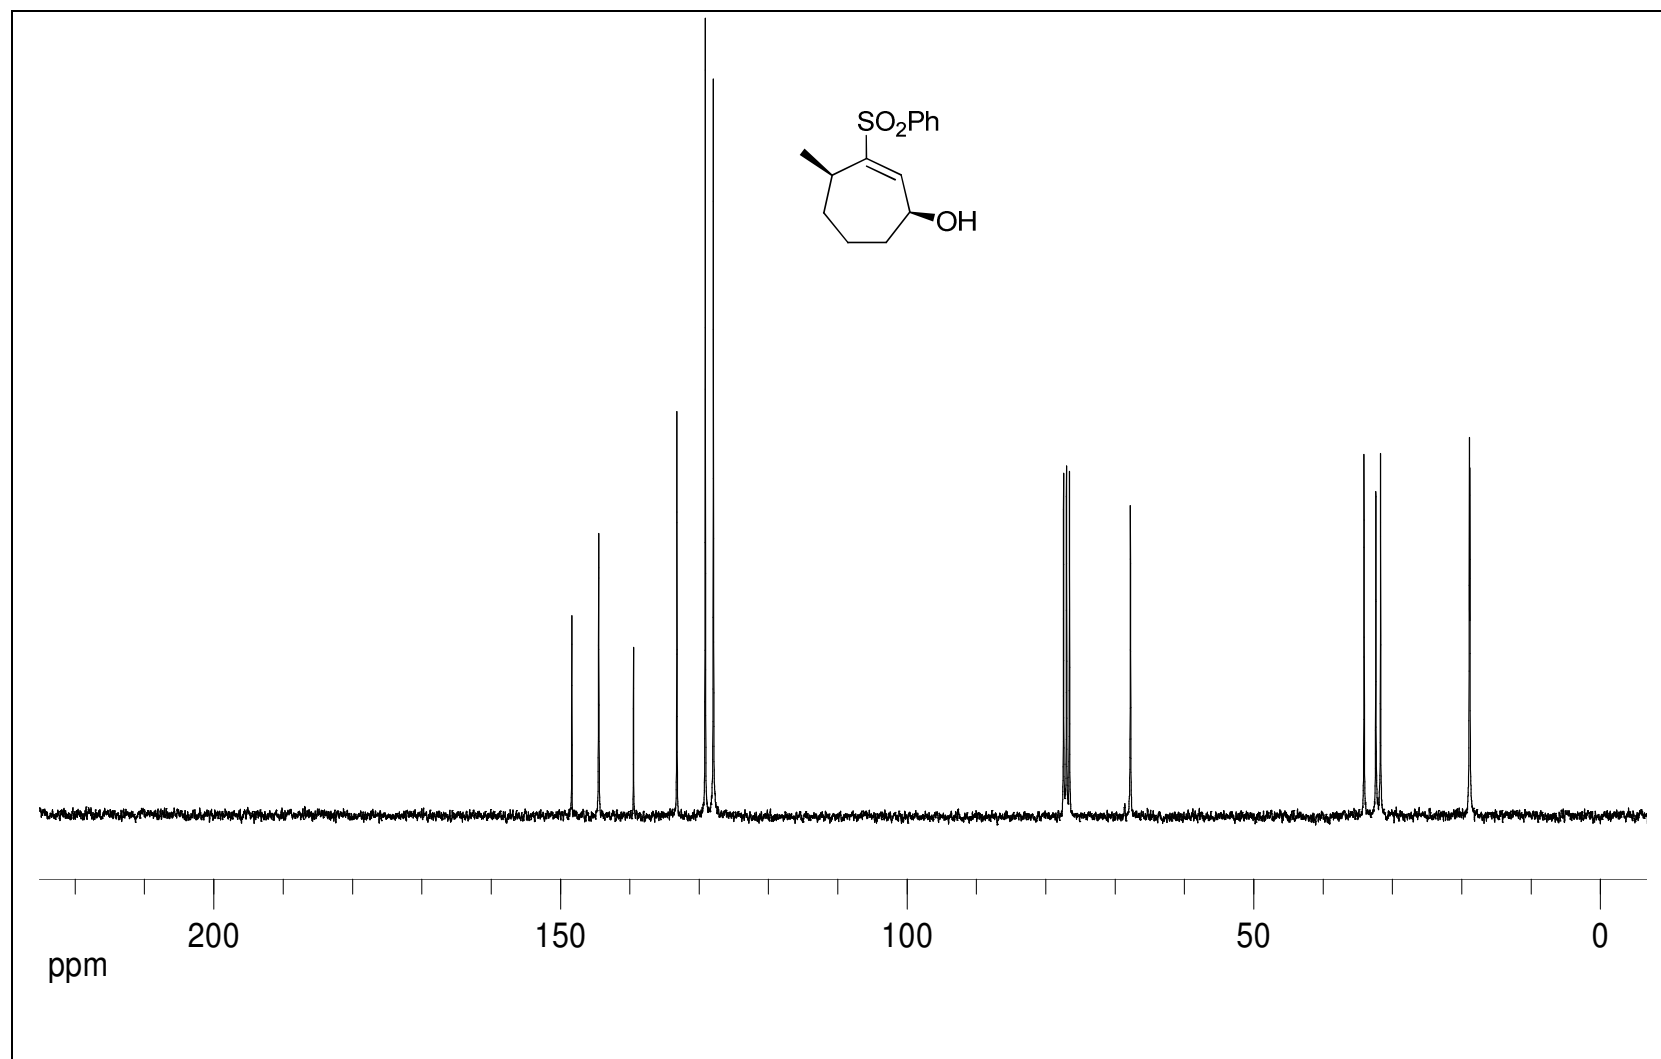

75 MHz  $^{13}\text{C}$  NMR of compound **III-5s** in  $\text{CDCl}_3$

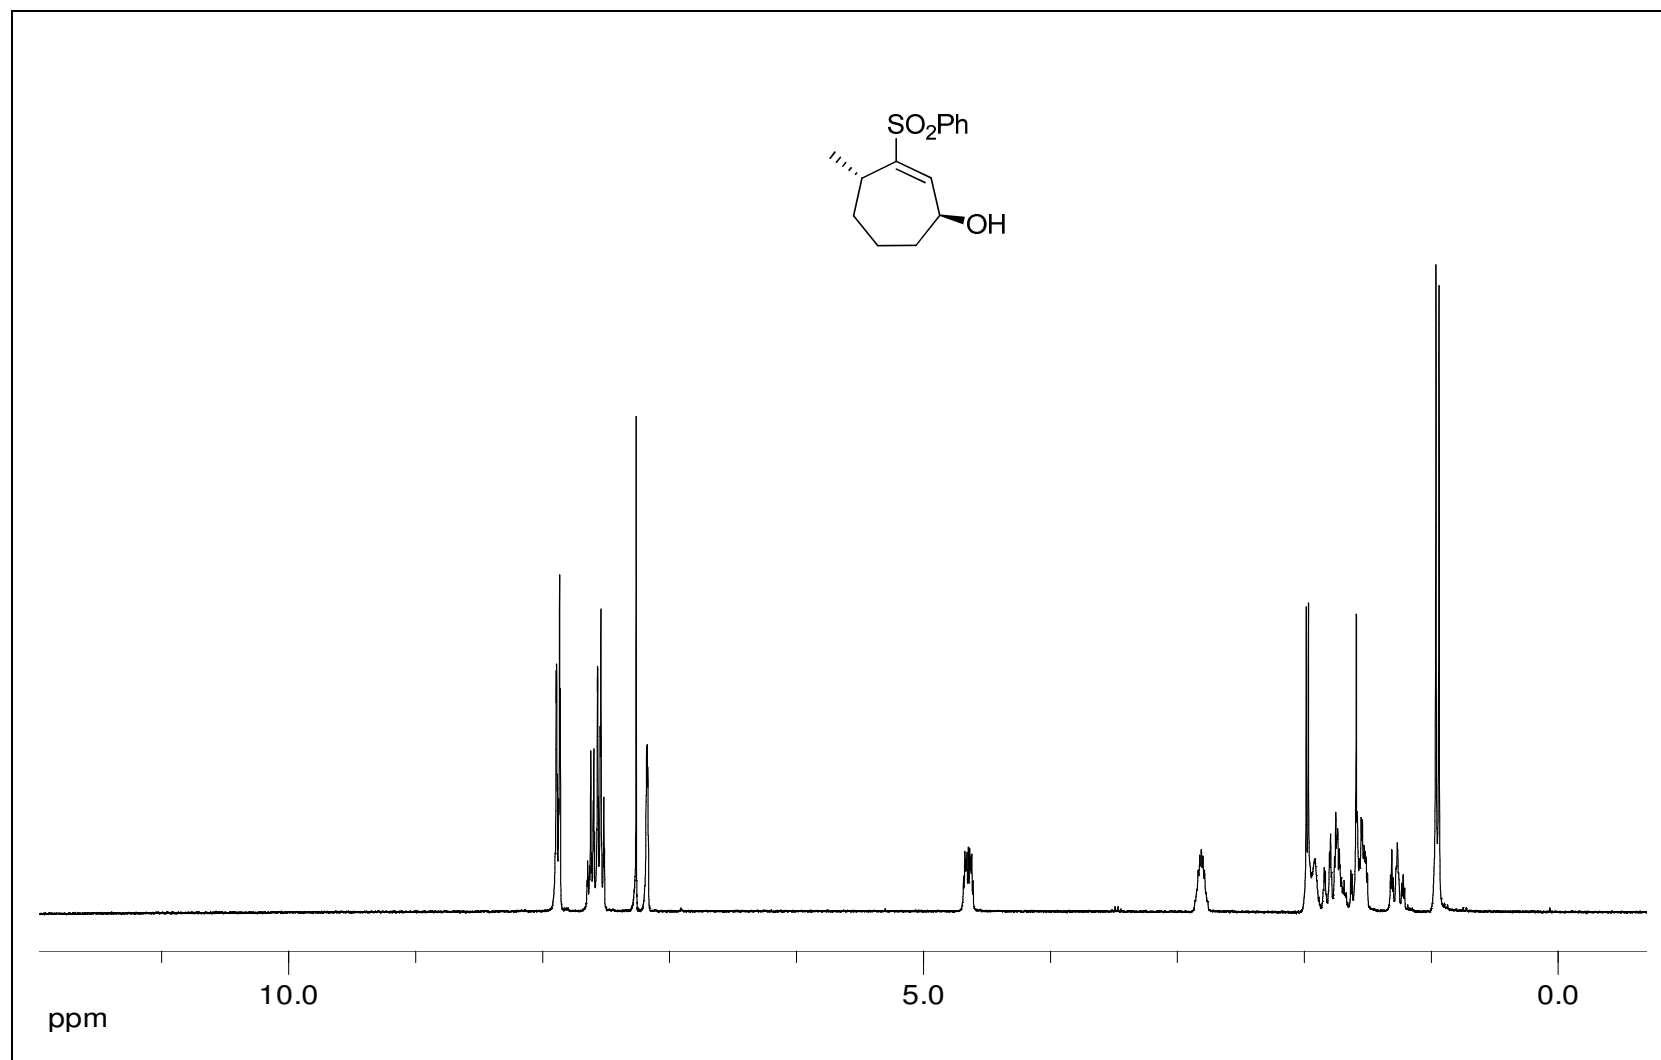

300 MHz <sup>1</sup>H NMR of compound **III-5a** in CDCl<sub>3</sub>

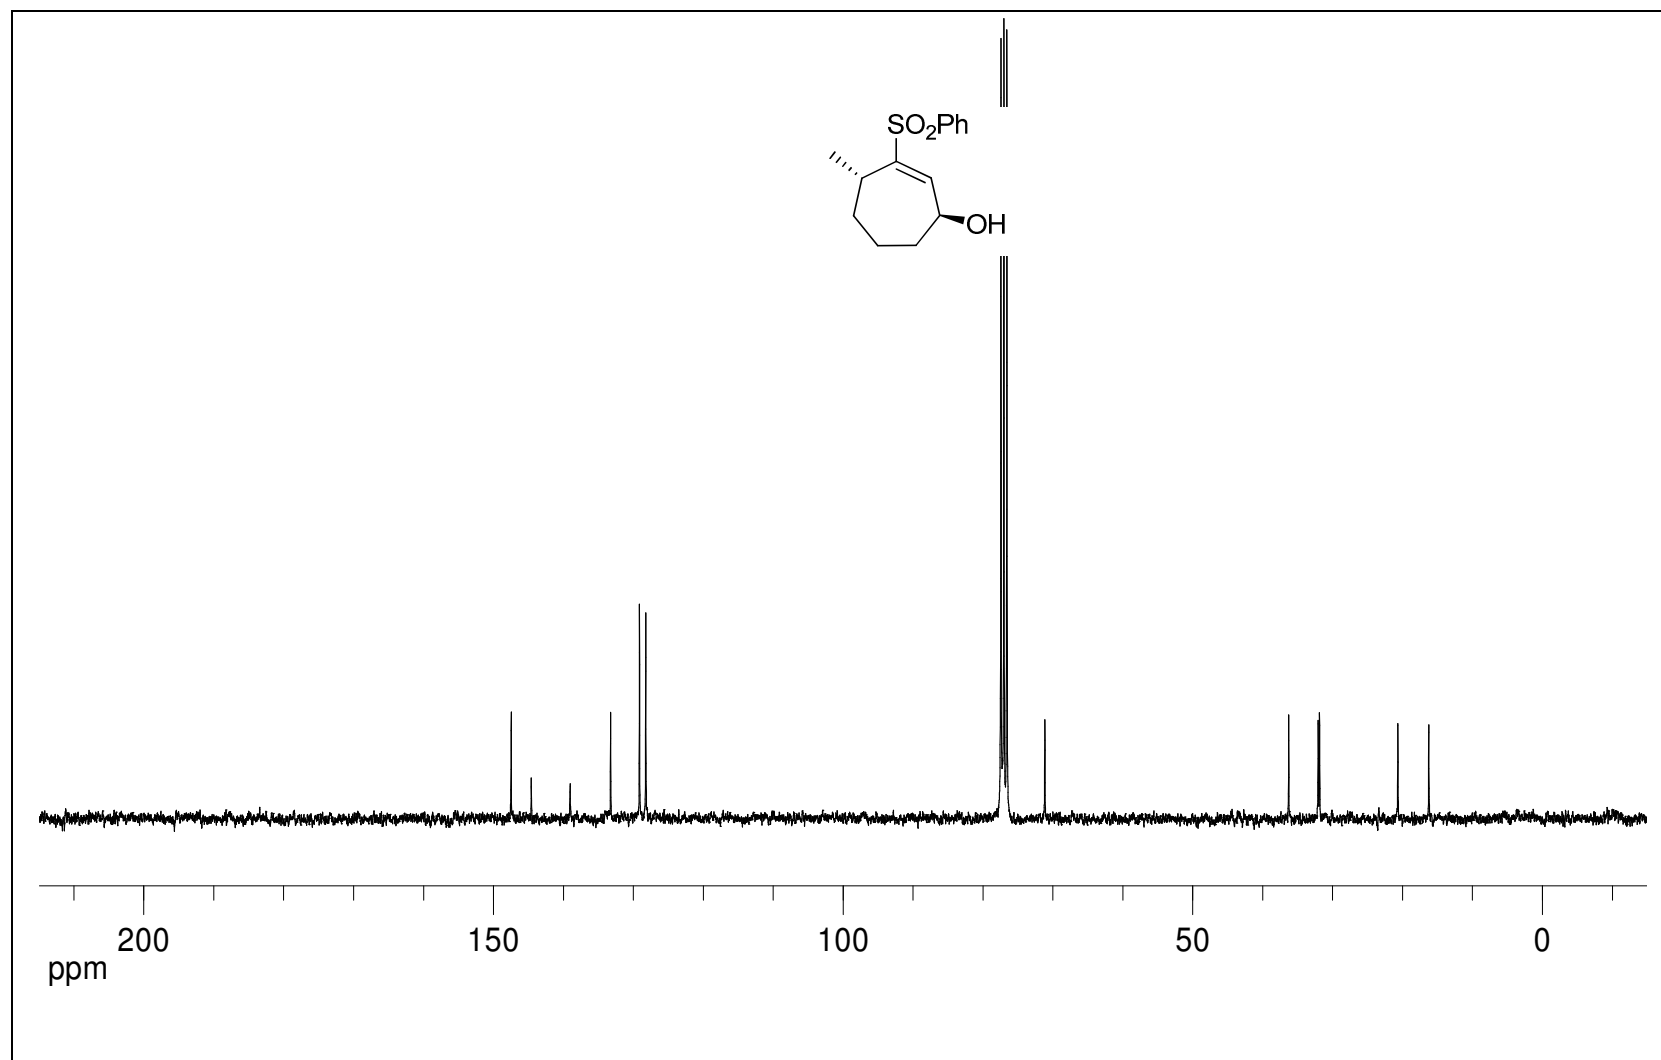

75 MHz <sup>13</sup>C NMR of compound **III-5a** in CDCl<sub>3</sub>

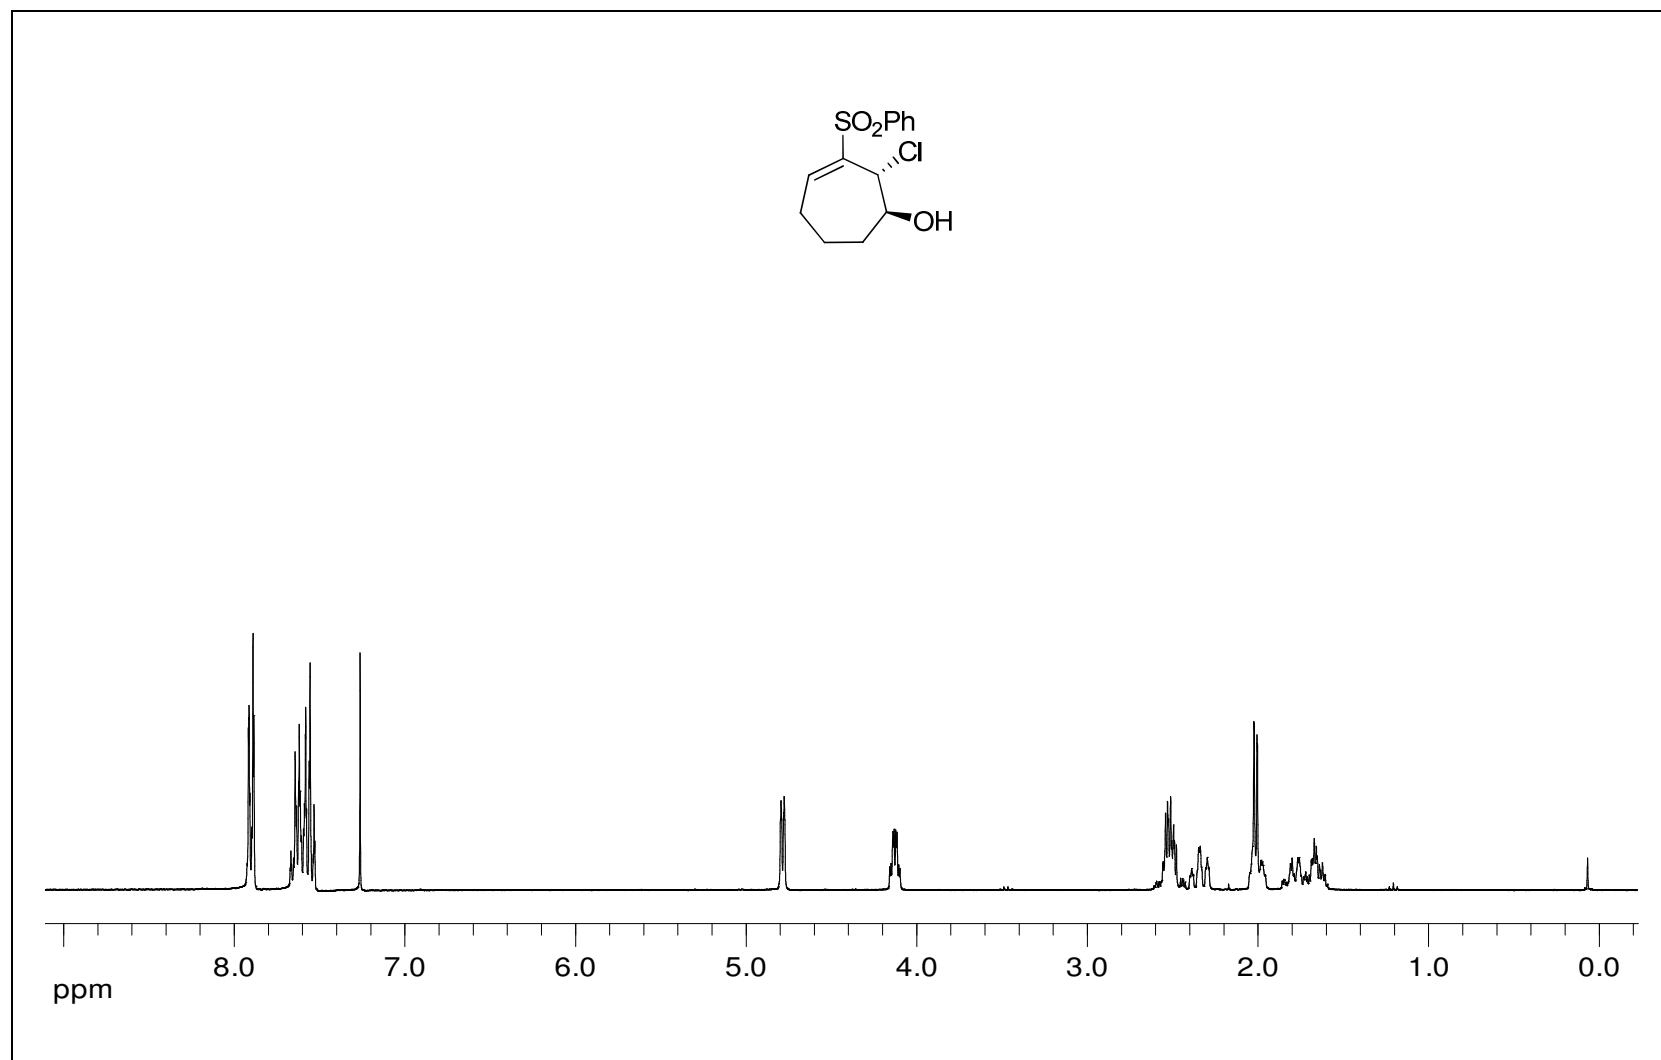

300 MHz <sup>1</sup>H NMR of compound **14H** in CDCl<sub>3</sub>

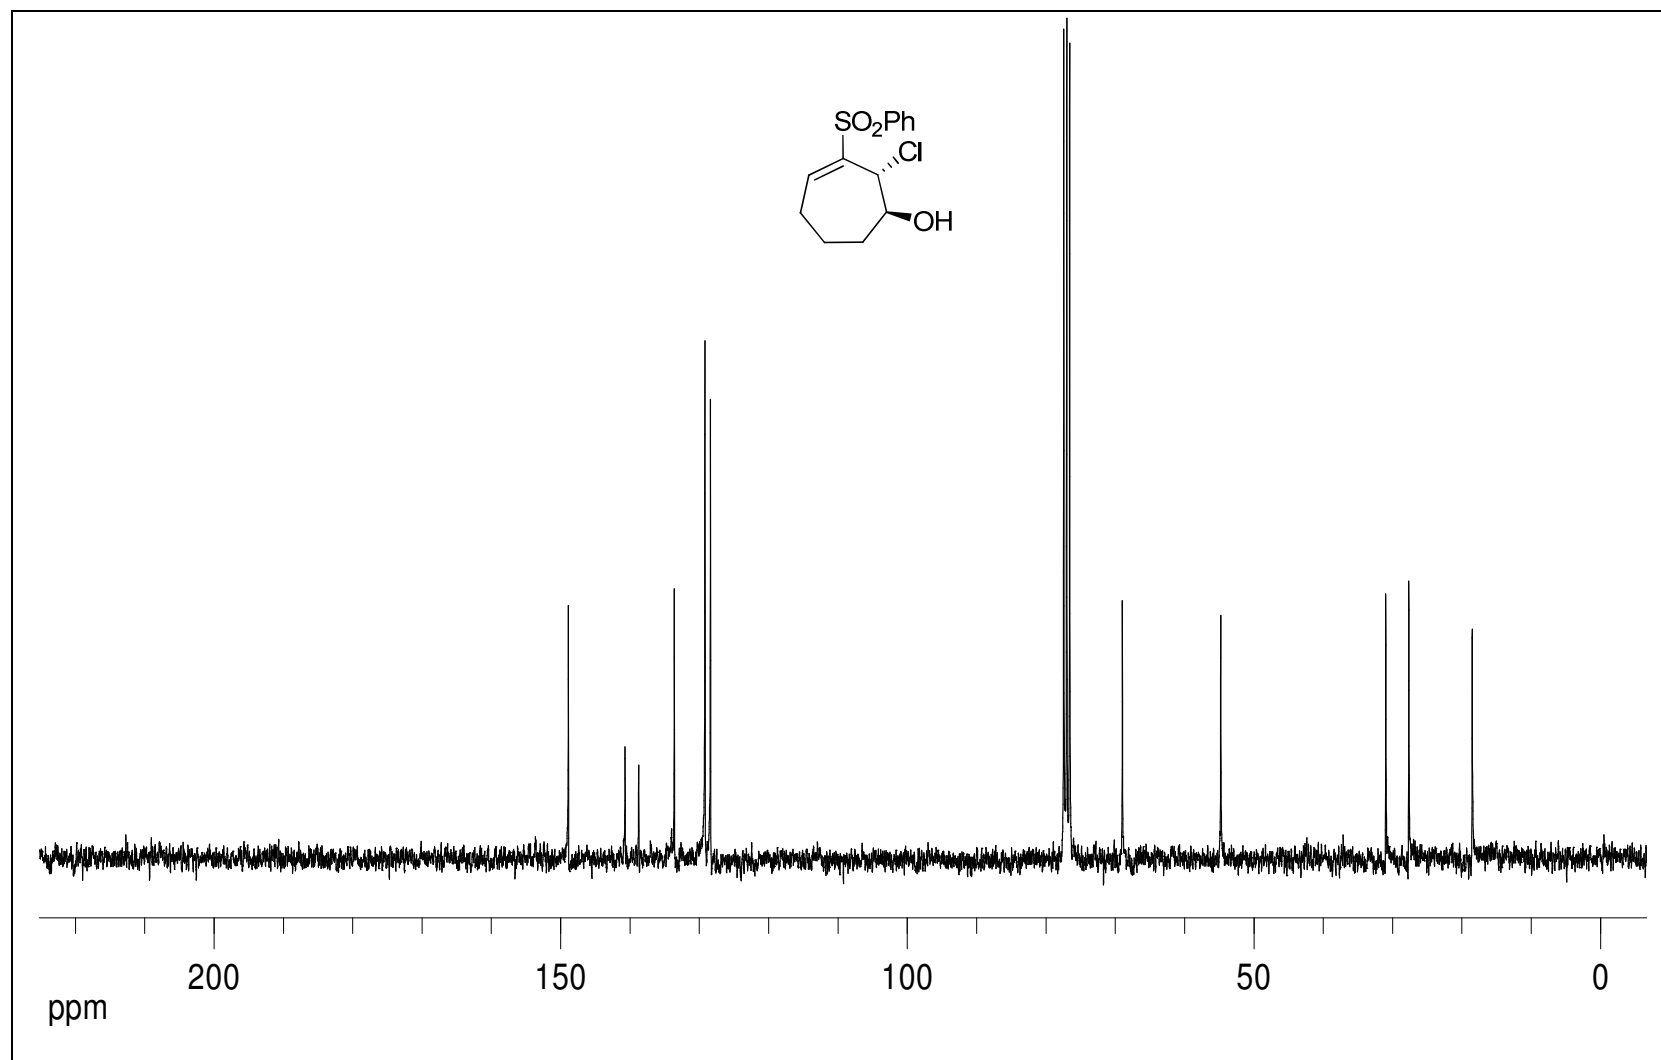

75 MHz <sup>13</sup>C NMR of compound **14H** in CDCl<sub>3</sub>



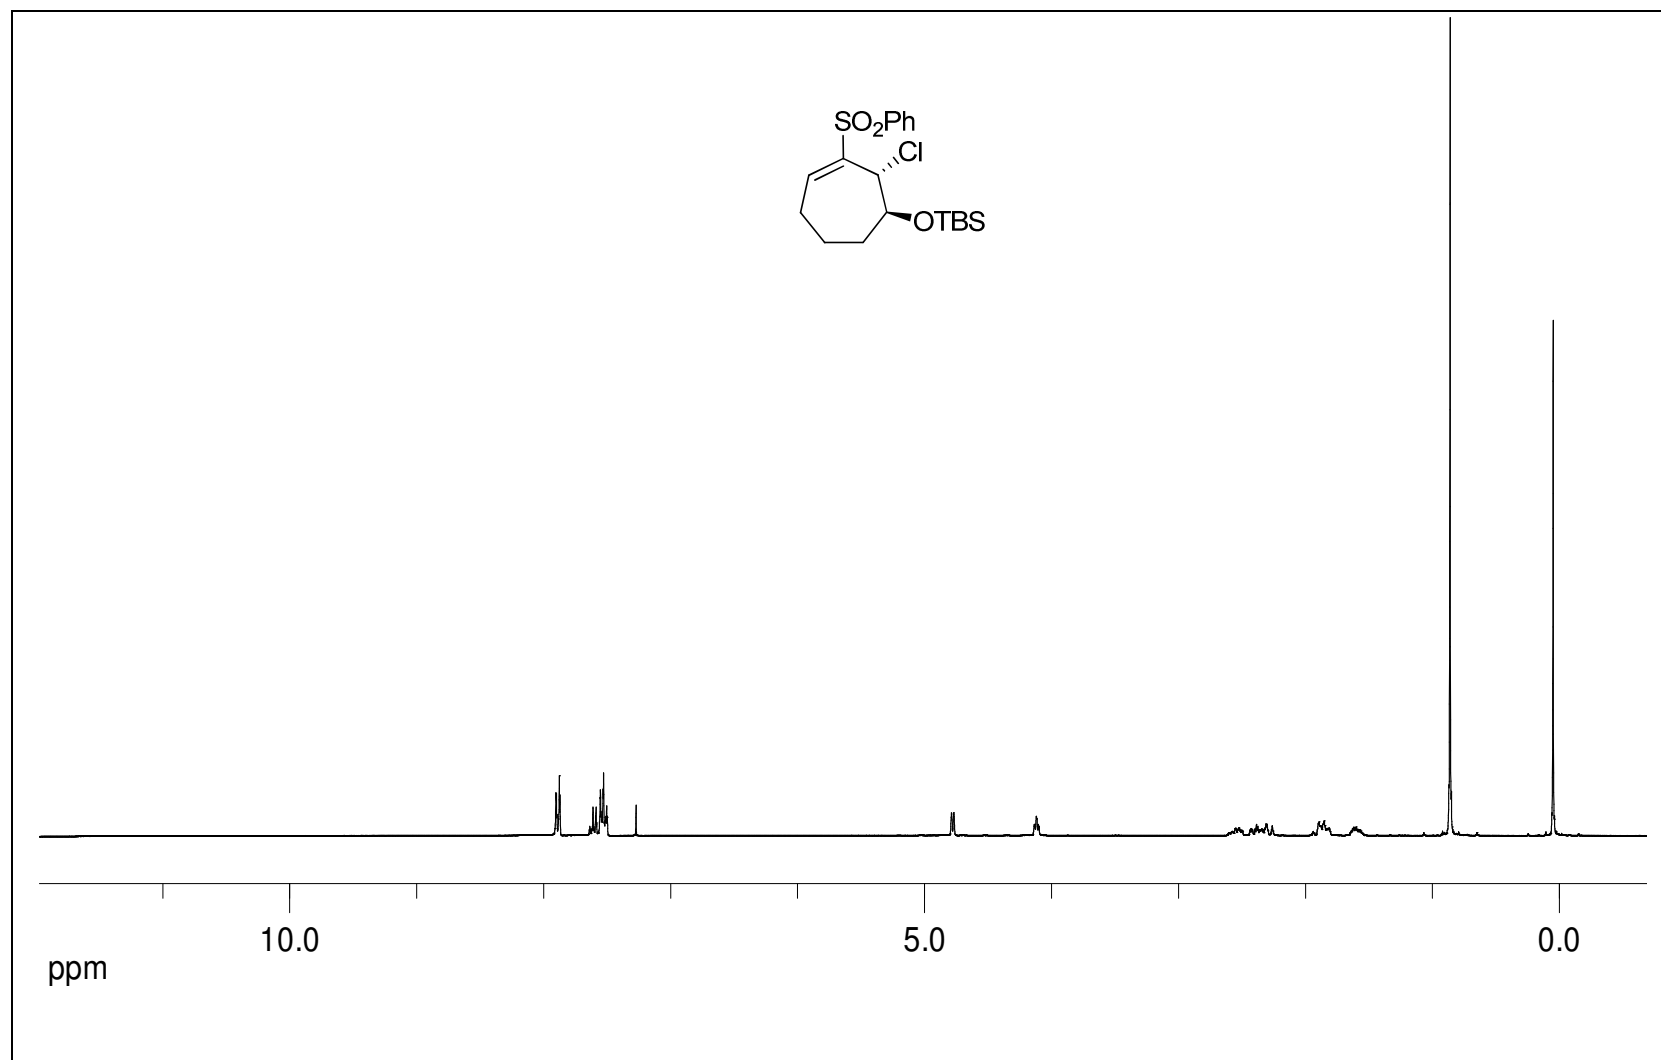

300 MHz <sup>1</sup>H NMR of compound **14Si** in CDCl<sub>3</sub>

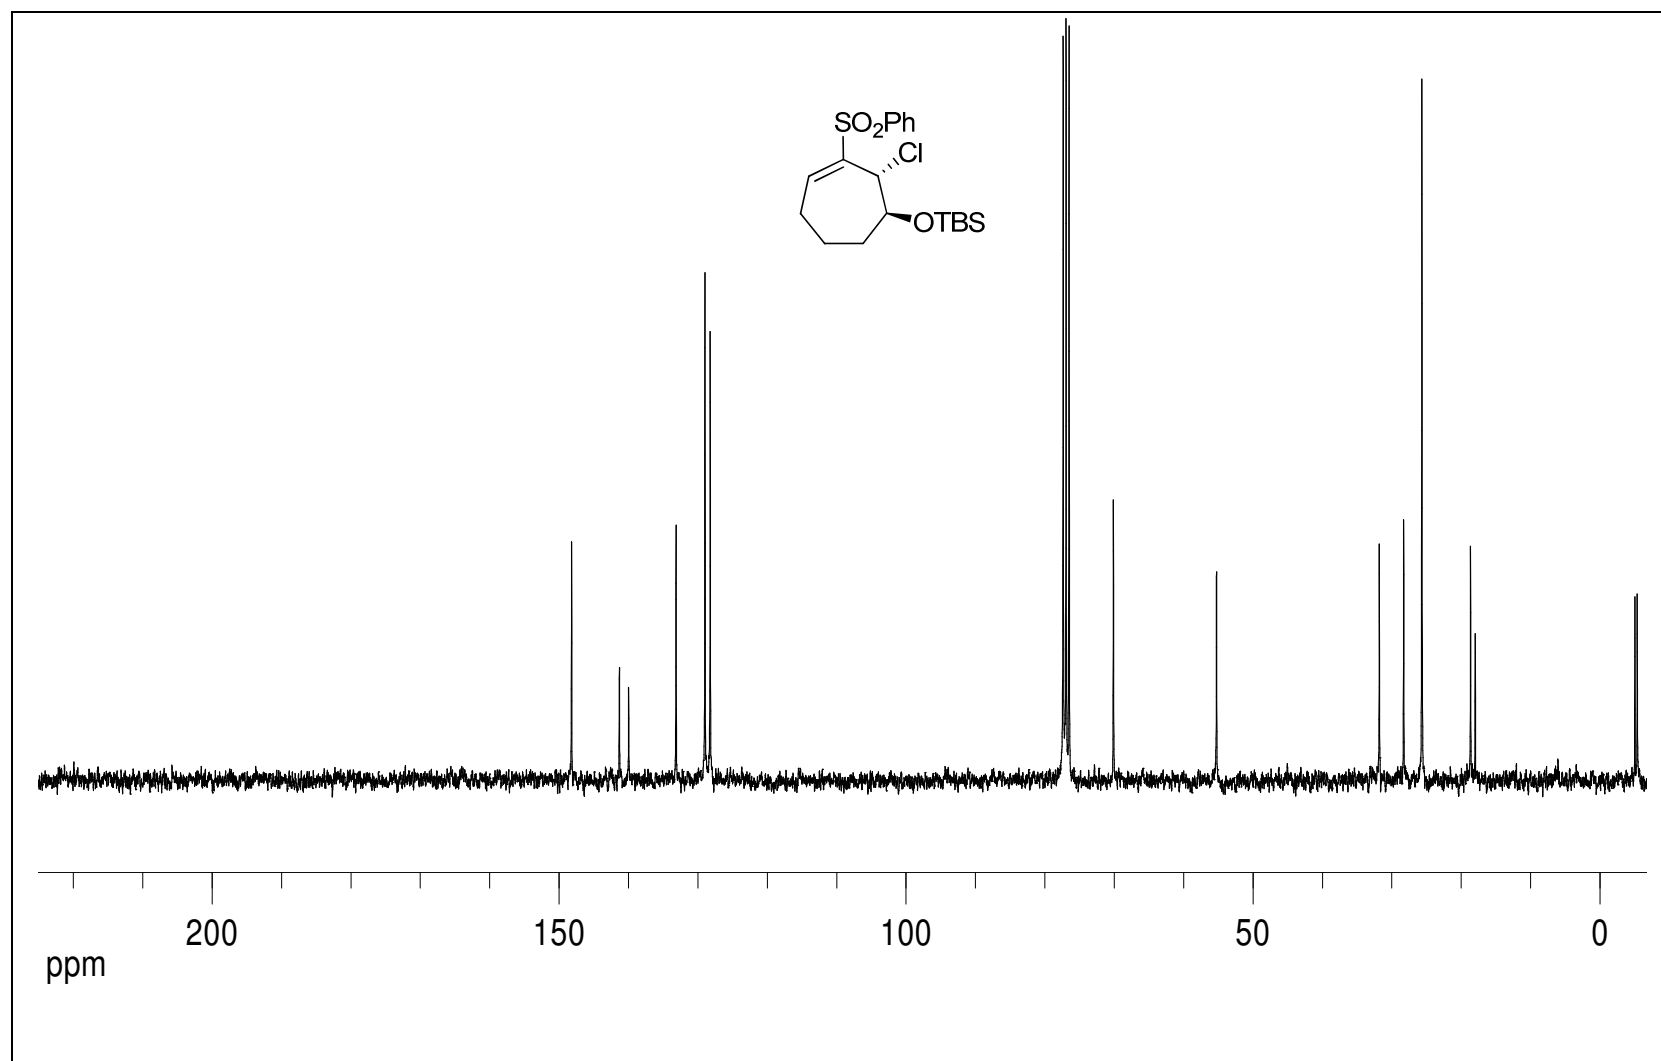

75 MHz  $^{13}\text{C}$  NMR of compound **14Si** in  $\text{CDCl}_3$

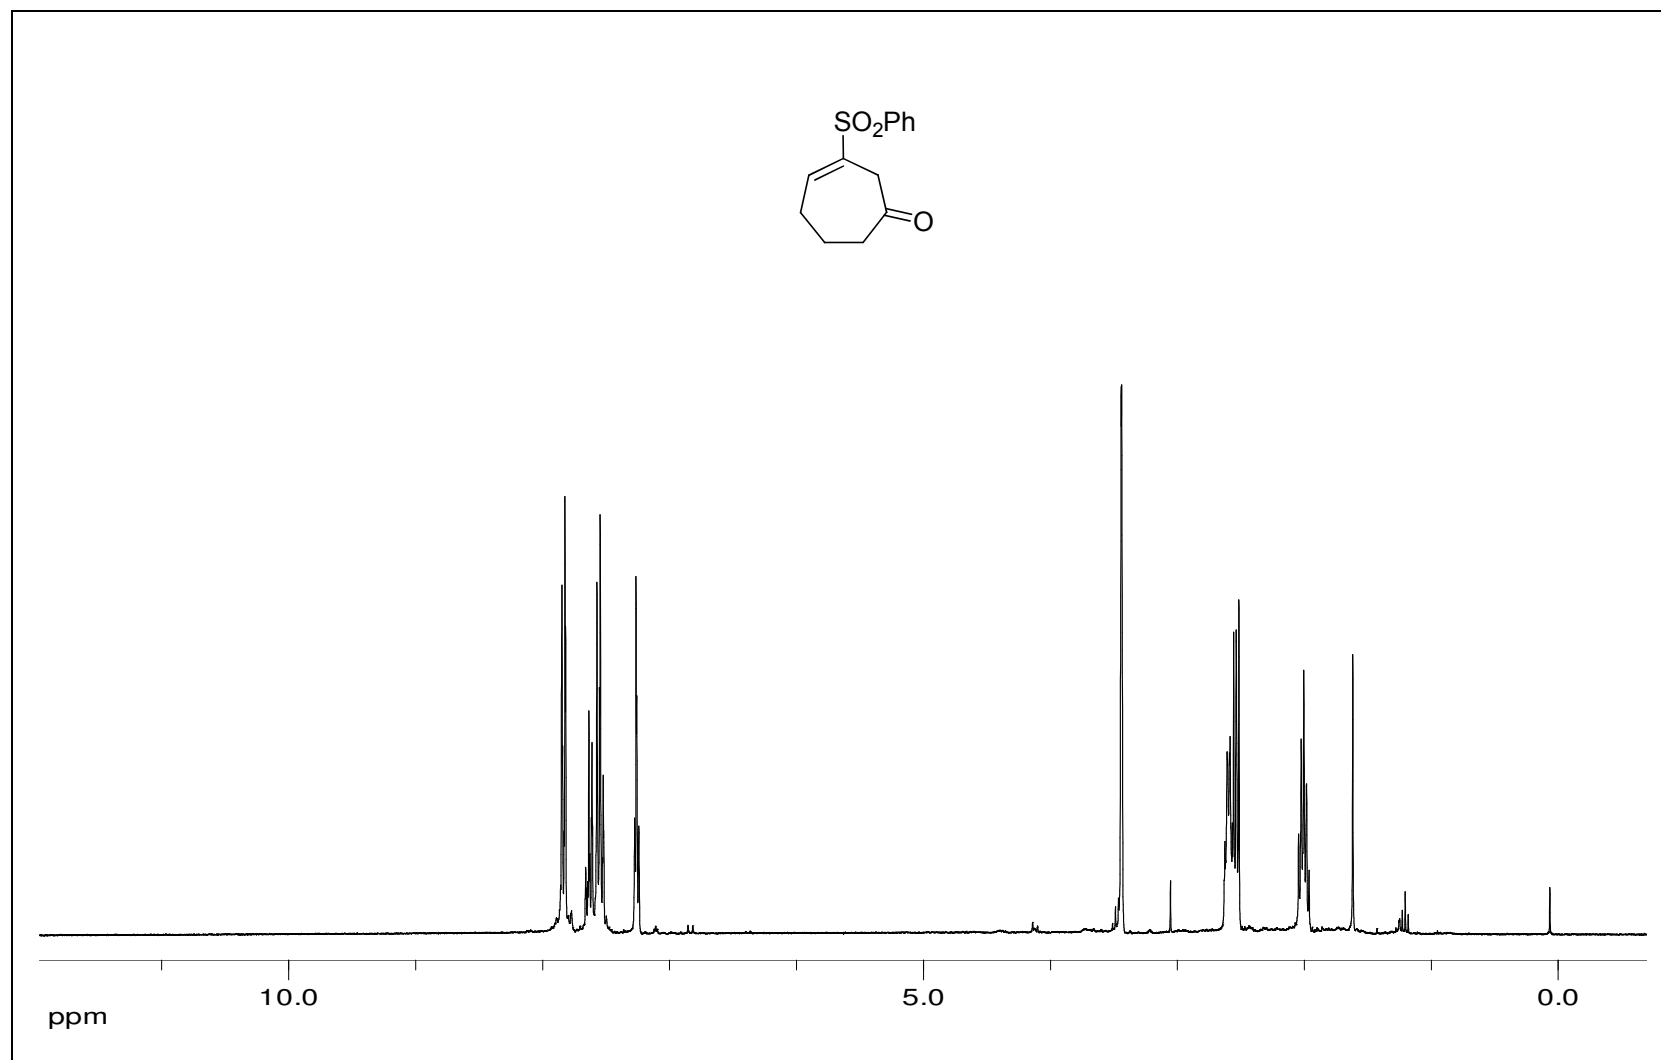

300 MHz <sup>1</sup>H NMR of compound **15** in CDCl<sub>3</sub>

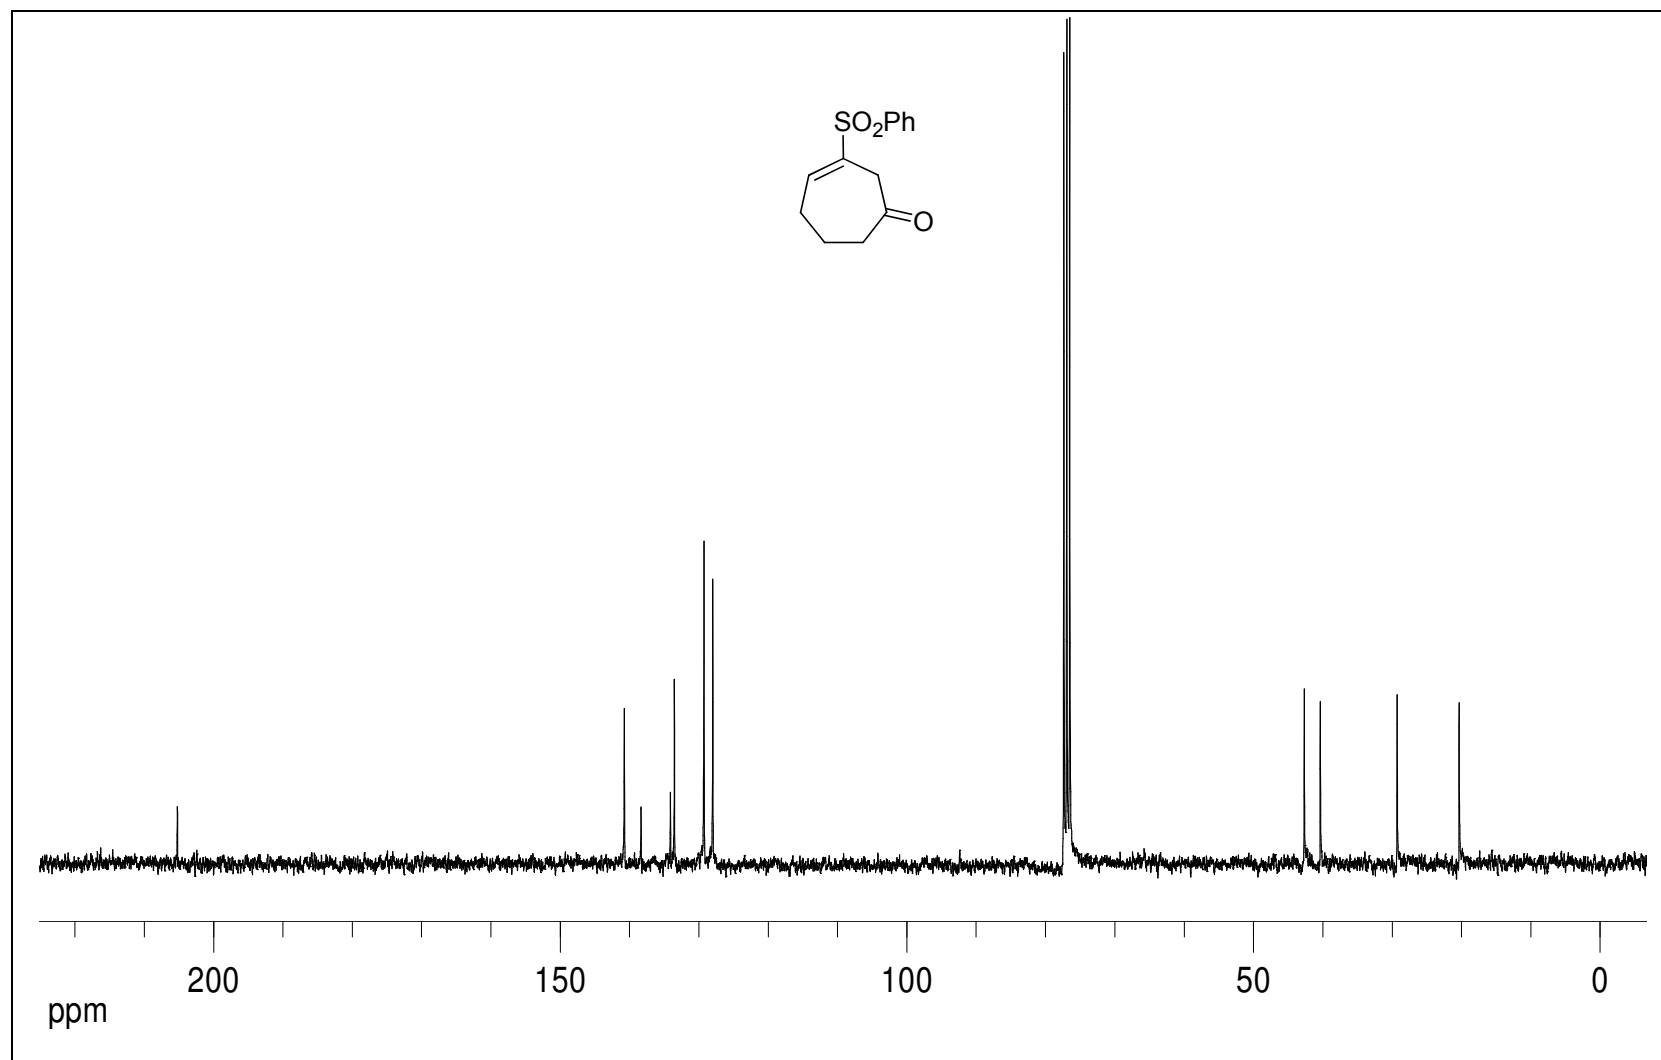

75 MHz <sup>13</sup>C NMR of compound **15** in CDCl<sub>3</sub>

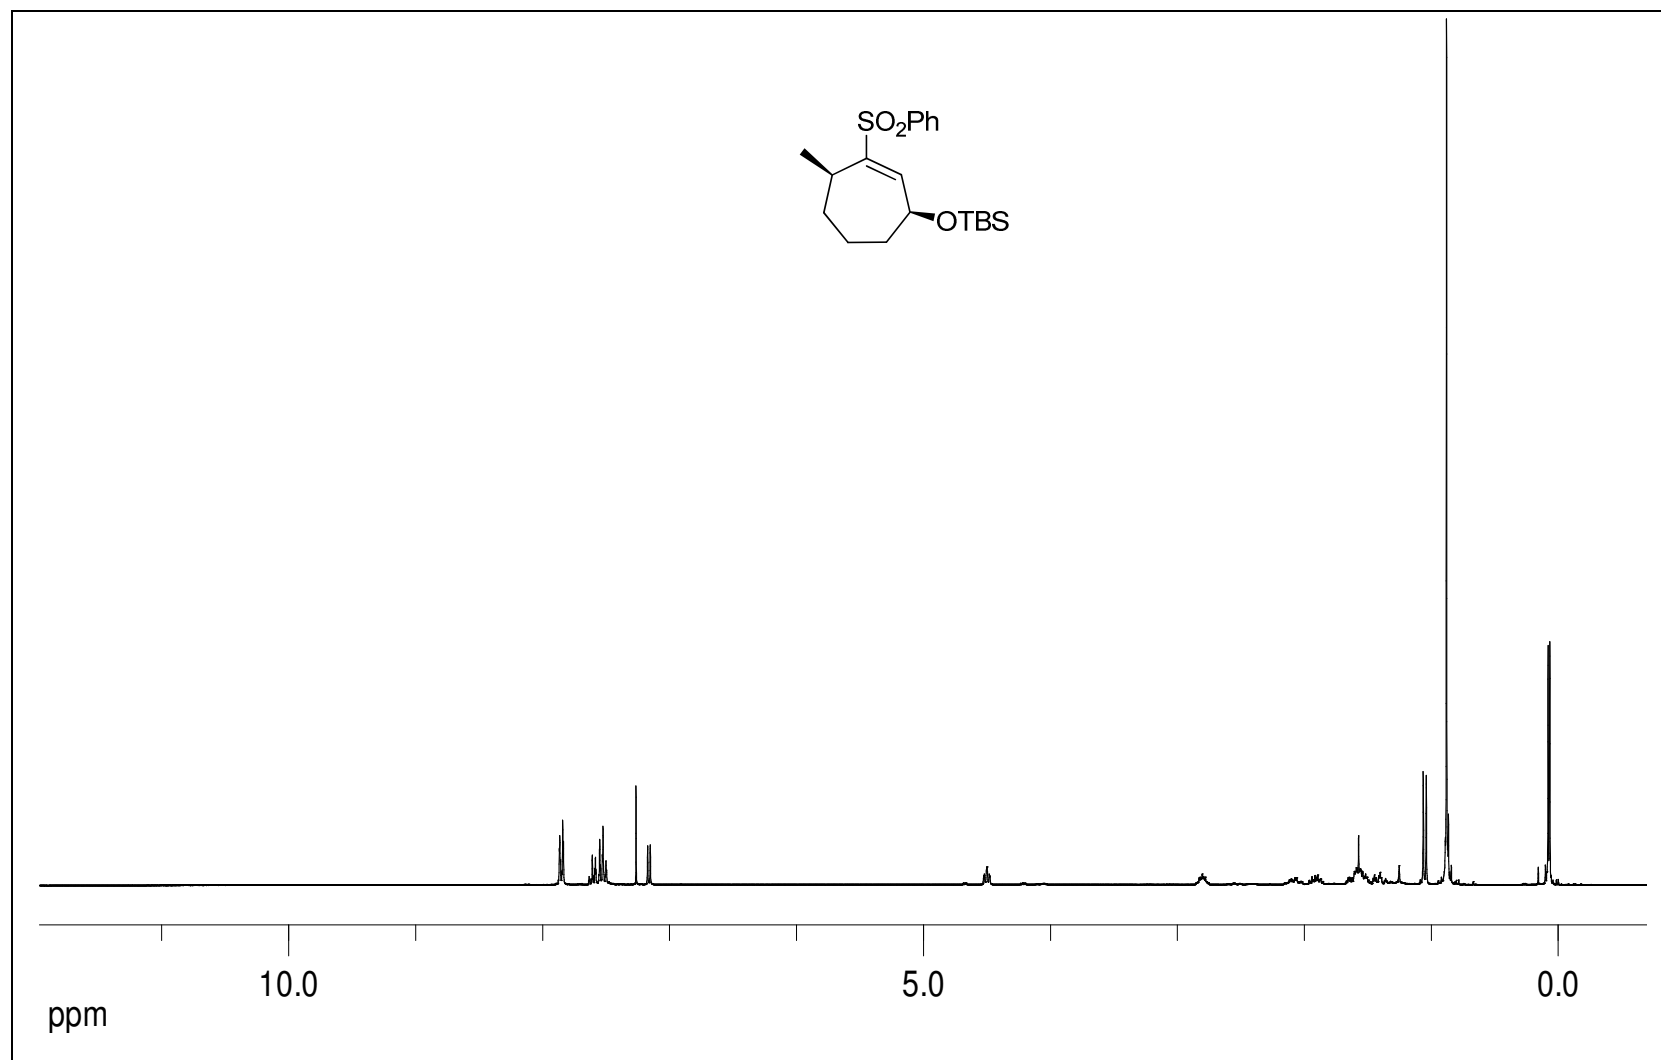

300 MHz  $^1\text{H}$  NMR of compound **III-5s(Si)** in  $\text{CDCl}_3$

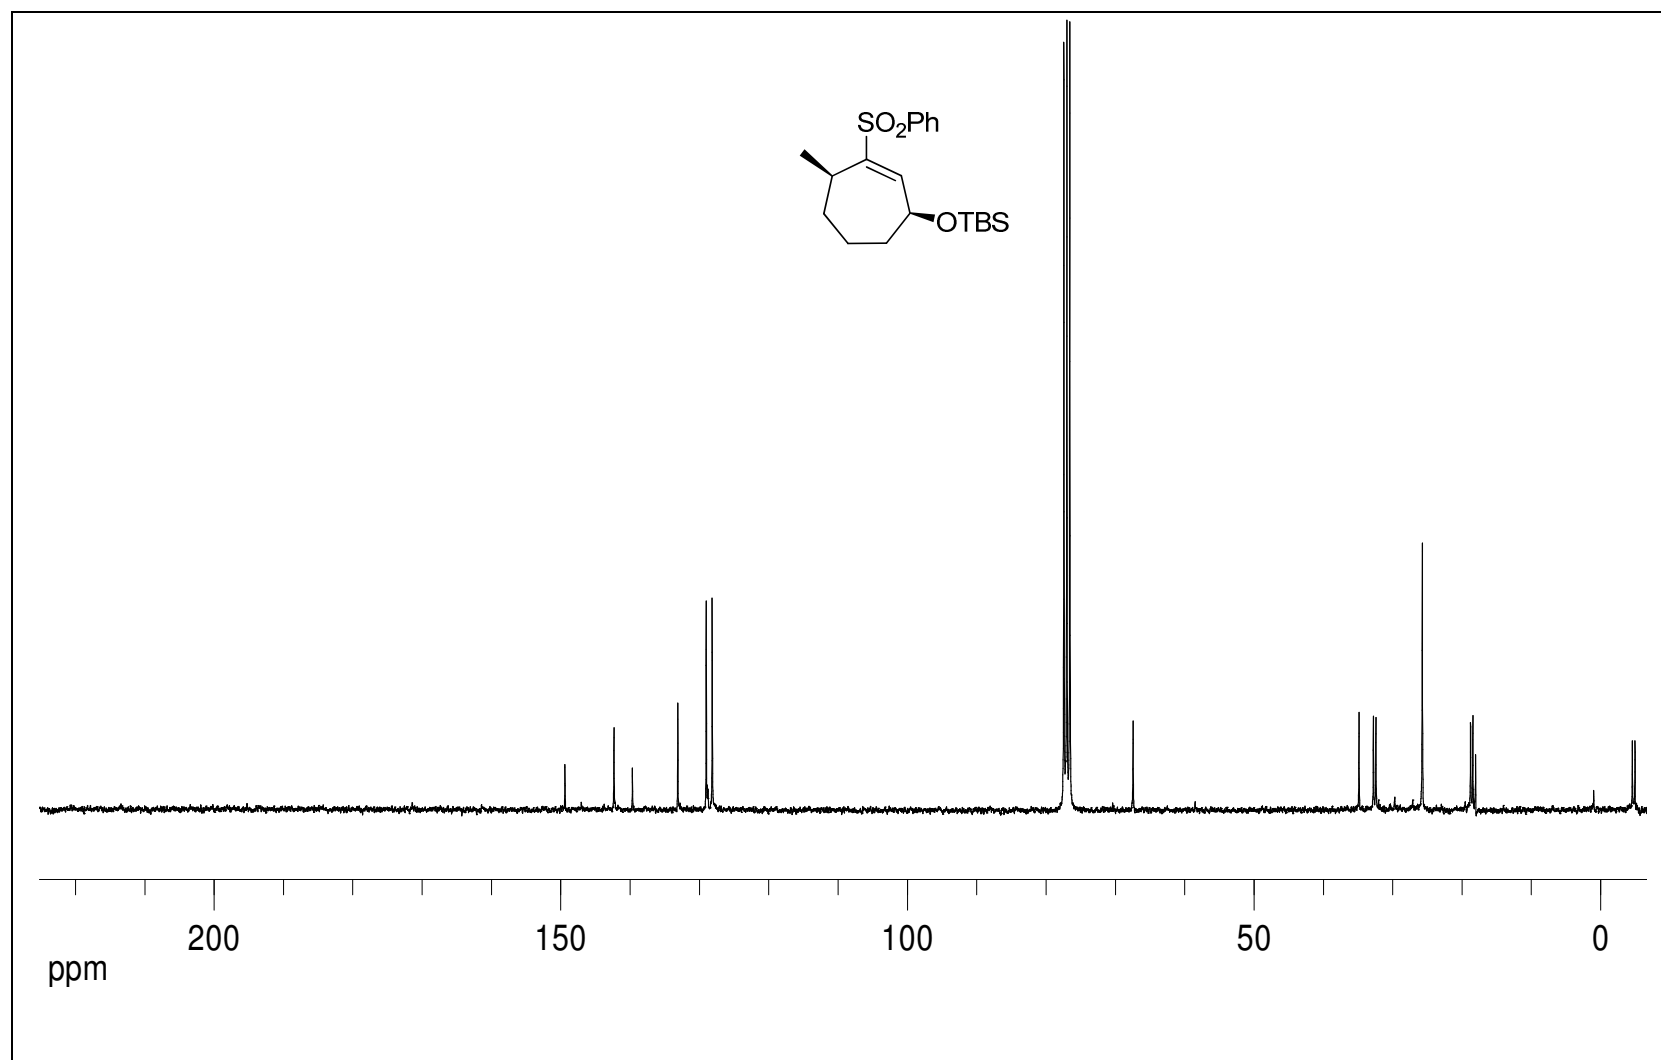

75 MHz  $^{13}\text{C}$  NMR of compound **III-5s(Si)** in  $\text{CDCl}_3$
